# Supplementary material
Source: publisher figshare collection journal article supplement (https://rs.figshare.com/ndownloader/files/17842682)
Supplement: Supplementary file 1 [file 17842682]

10	0.99	0.7	1	1	0.03	0.04	0.4	0.3	5	1	88.913	0.0685
10	0.99	0.7	1	1	0.03	0.04	0.4	0.2	5	1	87.046	0.0679
10	0.99	0.6	1	1	0.03	0.04	0.4	0	5	1	66.469	0.0535
10	0.99	0.9	1	1	0.03	0.04	0.4	0	5	1	229.83	0.0716
10	0.99	0.8	1	1	0.03	0.04	0.4	0.3	5	1	128.18	0.0762
10	0.99	0.7	1	1	0.03	0.04	0.4	0.6	5	1	94.136	0.0881
10	0.99	0.7	1	1	0.03	0.04	0.4	0	5	1	88.478	0.0633
10	0.99	0.8	1	1	0.03	0.04	0.4	0	5	1	123.04	0.0659
10	0.99	0.9	1	1	0.03	0.04	0.4	0.4	5	1	235.87	0.0887
10	0.99	0.7	1	1	0.03	0.04	0.4	0.1	5	1	87.185	0.061
10	0.99	0.8	1	1	0.03	0.04	0.4	0.1	5	1	124.13	0.066
10	0.99	0.6	1	1	0.03	0.04	0.4	0.3	5	1	71.543	0.078
10	0.99	0.8	1	1	0.03	0.04	0.4	0.6	5	1	134.88	0.0937
10	0.99	0.7	1	1	0.03	0.04	0.4	0.4	5	1	88.927	0.0753
10	0.99	0.7	1	1	0.03	0.04	0.4	0.7	5	1	95.092	0.0992
10	0.99	0.8	1	1	0.03	0.04	0.4	0.2	5	1	126.79	0.075
10	0.99	0.8	1	1	0.03	0.04	0.4	0.7	5	1	131.57	0.0901
10	0.99	0.8	1	1	0.03	0.04	0.4	0.4	5	1	128.57	0.0786
10	0.99	0.7	1	1	0.03	0.04	0.4	0.9	5	1	96.477	0.1117
10	0.99	0.7	1	1	0.03	0.04	0.4	0.5	5	1	90.315	0.0827
10	0.99	0.9	1	1	0.03	0.04	0.4	0.3	5	1	230.96	0.083
10	0.99	0.6	1	1	0.03	0.04	0.4	0.2	5	1	70.419	0.0725
10	0.99	0.4	1	1	0.03	0.04	0.4	0.9	5	1	59.971	0.1478
10	0.99	0.1	1	1	0.03	0.04	0.4	0.3	5	1	43.039	0.0996
10	0.99	0.6	1	1	0.03	0.04	0.4	0.1	5	1	67.561	0.0603
10	0.99	0.8	1	1	0.03	0.04	0.4	0.9	5	1	134.91	0.1045
10	0.99	0.2	1	1	0.03	0.04	0.4	0.4	5	1	47.263	0.1118
10	0.99	0.5	1	1	0.03	0.04	0.4	0.5	5	1	63.55	0.095
10	0.99	0.3	1	1	0.03	0.04	0.4	0.3	5	1	47.815	0.0831
10	0.99	0.2	1	1	0.03	0.04	0.4	0.3	5	1	45.267	0.0949
10	0.99	0.4	1	1	0.03	0.04	0.4	0.1	5	1	52.106	0.0619
10	0.99	0.7	1	1	0.03	0.04	0.4	0.8	5	1	97.017	0.1034
10	0.99	0.2	1	1	0.03	0.04	0.4	0.1	5	1	42.775	0.072
10	0.99	0.01	1	1	0.03	0.04	0.4	0.4	5	1	43.367	0.1887
10	0.99	0.1	1	1	0.03	0.04	0.4	0	5	1	38.76	0.0654
10	0.99	0.2	1	1	0.03	0.04	0.4	0.8	5	1	51.704	0.1757
10	0.99	0.01	1	1	0.03	0.04	0.4	0	5	1	36.792	0.0705
10	0.99	0.1	1	1	0.03	0.04	0.4	0.7	5	1	48.542	0.2044
10	0.99	0.9	1	1	0.03	0.04	0.4	0.1	5	1	233.26	0.0778
10	0.99	0.4	1	1	0.03	0.04	0.4	0.4	5	1	54.405	0.0895
10	0.99	0.2	1	1	0.03	0.04	0.4	0.5	5	1	47.343	0.1258
10	0.99	0.9	1	1	0.03	0.04	0.4	0.6	5	1	237.03	0.091
10	0.99	0.01	1	1	0.03	0.04	0.4	0.3	5	1	41.357	0.1509
10	0.99	0.6	1	1	0.03	0.04	0.4	0.6	5	1	76.572	0.0974
10	0.99	0.2	1	1	0.03	0.04	0.4	0.6	5	1	49.109	0.1398
10	0.99	0.9	1	1	0.03	0.04	0.4	0.2	5	1	235.08	0.0771
10	0.99	0.1	1	1	0.03	0.04	0.4	0.2	5	1	41.189	0.0866
10	0.99	0.6	1	1	0.03	0.04	0.4	0.8	5	1	77.465	0.1057
10	0.99	0.2	1	1	0.03	0.04	0.4	0.7	5	1	48.222	0.1575
10	0.99	0.3	1	1	0.03	0.04	0.4	0.8	5	1	55.351	0.1576
10	0.99	0.5	1	1	0.03	0.04	0.4	0.8	5	1	68.251	0.121
10	0.99	0.2	1	1	0.03	0.04	0.4	0	5	1	41.074	0.0587
10	0.99	0.2	1	1	0.03	0.04	0.4	0.2	5	1	44.13	0.0811
10	0.99	0.3	1	1	0.03	0.04	0.4	0	5	1	44.85	0.0586
10	0.99	0.8	1	1	0.03	0.04	0.4	0.8	5	1	136.81	0.1045
10	0.99	0.3	1	1	0.03	0.04	0.4	0.1	5	1	45.489	0.0643
10	0.99	0.3	1	1	0.03	0.04	0.4	0.7	5	1	53.329	0.1383
10	0.99	0.5	1	1	0.03	0.04	0.4	0.1	5	1	58.505	0.0643
10	0.99	0.5	1	1	0.03	0.04	0.4	0.7	5	1	65.024	0.1071
10	0.99	0.01	1	1	0.03	0.04	0.4	0.9	5	1	44.098	0.4515
10	0.99	0.1	1	1	0.03	0.04	0.4	0.6	5	1	47.011	0.172
10	0.99	0.3	1	1	0.03	0.04	0.4	0.6	5	1	51.971	0.1244
10	0.99	0.3	1	1	0.03	0.04	0.4	0.2	5	1	46.835	0.0727
10	0.99	0.4	1	1	0.03	0.04	0.4	0.7	5	1	57.633	0.1233
10	0.99	0.4	1	1	0.03	0.04	0.4	0.6	5	1	56.783	0.1118
10	0.99	0.1	1	1	0.03	0.04	0.4	0.1	5	1	40.02	0.0762
10	0.99	0.5	1	1	0.03	0.04	0.4	0.6	5	1	64.934	0.1008
10	0.99	0.4	1	1	0.03	0.04	0.4	0.5	5	1	55.273	0.094
10	0.99	0.01	1	1	0.03	0.04	0.4	0.2	5	1	39.762	0.1133
10	0.99	0.4	1	1	0.03	0.04	0.4	0.8	5	1	57.858	0.1325
10	0.99	0.99	1	1	0.03	0.04	0.4	0	5	1	1279.6	0.1001
10	0.99	0.5	1	1	0.03	0.04	0.4	0	5	1	57.318	0.0575
10	0.99	0.9	1	1	0.03	0.04	0.4	0.5	5	1	231.62	0.0829
10	0.99	0.1	1	1	0.03	0.04	0.4	0.4	5	1	44.28	0.1265
10	0.99	0.01	1	1	0.03	0.04	0.4	0.1	5	1	38.556	0.0863
10	0.99	0.4	1	1	0.03	0.04	0.4	0	5	1	50.127	0.0558
10	0.99	0.1	1	1	0.03	0.04	0.4	0.5	5	1	45.695	0.1452
10	0.9	0.7	1	1	0.03	0.04	0.4	0.6	5	1	79.847	0.1022
10	0.99	0.5	1	1	0.03	0.04	0.4	0.4	5	1	61.101	0.0848
10	0.9	0.3	1	1	0.03	0.04	0.4	0.1	5	1	44.6	0.0763
10	0.99	0.5	1	1	0.03	0.04	0.4	0.9	5	1	67.535	0.1352
10	0.99	0.6	1	1	0.03	0.04	0.4	0.4	5	1	72.038	0.077
10	0.9	0.8	1	1	0.03	0.04	0.4	0.5	5	1	103.11	0.1001
10	0.9	0.4	1	1	0.03	0.04	0.4	0.3	5	1	50.955	0.0868
10	0.99	0.5	1	1	0.03	0.04	0.4	0.3	5	1	60.69	0.0777
10	0.99	0.6	1	1	0.03	0.04	0.4	0.5	5	1	72.755	0.0851
10	0.99	0.01	1	1	0.03	0.04	0.4	0.5	5	1	44.662	0.2316
10	0.9	0.8	1	1	0.03	0.04	0.4	0.7	5	1	101.88	0.0965
10	0.9	0.5	1	1	0.03	0.04	0.4	0	5	1	56.205	0.0749
10	0.99	0.6	1	1	0.03	0.04	0.4	0.9	5	1	79.412	0.1183
10	0.9	0.4	1	1	0.03	0.04	0.4	0.9	5	1	55.3	0.1411
10	0.9	0.6	1	1	0.03	0.04	0.4	0.9	5	1	70.251	0.122
10	0.99	0.4	1	1	0.03	0.04	0.4	0.3	5	1	53.593	0.0808
10	0.99	0.8	1	1	0.03	0.04	0.4	0.5	5	1	129.21	0.0841
10	0.9	0.4	1	1	0.03	0.04	0.4	0.1	5	1	50.06	0.0766
10	0.9	0.6	1	1	0.03	0.04	0.4	0.1	5	1	64.016	0.0721
10	0.9	0.6	1	1	0.03	0.04	0.4	0.3	5	1	65.501	0.0861
10	0.99	0.1	1	1	0.03	0.04	0.4	0.9	5	1	49.66	0.257
10	0.99	0.9	1	1	0.03	0.04	0.4	0.9	5	1	245.44	0.0999
10	0.99	0.6	1	1	0.03	0.04	0.4	0.7	5	1	76.914	0.1039
10	0.99	0.3	1	1	0.03	0.04	0.4	0.9	5	1	55.709	0.1676
10	0.99	0.5	1	1	0.03	0.04	0.4	0.2	5	1	59.416	0.0707
10	0.9	0.5	1	1	0.03	0.04	0.4	0.1	5	1	55.411	0.077
10	0.9	0.4	1	1	0.03	0.04	0.4	0.4	5	1	52.669	0.0959
10	0.9	0.5	1	1	0.03	0.04	0.4	0.6	5	1	60.146	0.1123
10	0.99	0.01	1	1	0.03	0.04	0.4	0.6	5	1	43.792	0.2779
10	0.99	0.01	1	1	0.03	0.04	0.4	0.7	5	1	45.067	0.3365
10	0.9	0.7	1	1	0.03	0.04	0.4	0.9	5	1	80.751	0.1054
10	0.9	0.1	1	1	0.03	0.04	0.4	0.2	5	1	41.142	0.1027
10	0.9	0.1	1	1	0.03	0.04	0.4	0.1	5	1	40.789	0.0888
10	0.9	0.3	1	1	0.03	0.04	0.4	0.6	5	1	50.774	0.1245
10	0.9	0.5	1	1	0.03	0.04	0.4	0.5	5	1	59.342	0.0993
10	0.9	0.5	1	1	0.03	0.04	0.4	0.3	5	1	57.372	0.0906
10	0.9	0.4	1	1	0.03	0.04	0.4	0.5	5	1	52.141	0.0995
10	0.9	0.6	1	1	0.03	0.04	0.4	0.5	5	1	66.478	0.0928
10	0.9	0.6	1	1	0.03	0.04	0.4	0	5	1	62.676	0.0704
10	0.9	0.5	1	1	0.03	0.04	0.4	0.2	5	1	56.542	0.0836
10	0.9	0.1	1	1	0.03	0.04	0.4	0.5	5	1	44.342	0.1491
10	0.9	0.8	1	1	0.03	0.04	0.4	0.1	5	1	97.77	0.0828
10	0.9	0.5	1	1	0.03	0.04	0.4	0.4	5	1	58.473	0.0946
10	0.9	0.3	1	1	0.03	0.04	0.4	0.9	5	1	54.088	0.1608
10	0.99	0.01	1	1	0.03	0.04	0.4	0.8	5	1	44.963	0.4005
10	0.9	0.2	1	1	0.03	0.04	0.4	0	5	1	41.255	0.0763
10	0.9	0.7	1	1	0.03	0.04	0.4	0.1	5	1	76.092	0.0789
10	0.9	0.9	1	1	0.03	0.04	0.4	0.2	5	1	143.05	0.0952
10	0.9	0.7	1	1	0.03	0.04	0.4	0.2	5	1	79.937	0.0843
10	0.9	0.2	1	1	0.03	0.04	0.4	0.7	5	1	49.124	0.1608
10	0.99	0.9	1	1	0.03	0.04	0.4	0.7	5	1	246.2	0.0973
10	0.9	0.6	1	1	0.03	0.04	0.4	0.7	5	1	66.049	0.1032
10	0.9	0.2	1	1	0.03	0.04	0.4	0.2	5	1	43.092	0.0888
10	0.99	0.3	1	1	0.03	0.04	0.4	0.4	5	1	48.428	0.0936
10	0.9	0.6	1	1	0.03	0.04	0.4	0.8	5	1	69.604	0.1088
10	0.9	0.9	1	1	0.03	0.04	0.4	0.1	5	1	143.77	0.0957
10	0.9	0.99	1	1	0.03	0.04	0.4	0.9	5	1	240.99	0.1025
10	0.9	0.1	1	1	0.03	0.04	0.4	0	5	1	39.018	0.0767
10	0.9	0.7	1	1	0.03	0.04	0.4	0	5	1	77.083	0.0766
10	0.9	0.1	1	1	0.03	0.04	0.4	0.3	5	1	43.201	0.1154
10	0.99	0.9	1	1	0.03	0.04	0.4	0.8	5	1	240.51	0.097
10	0.9	0.6	1	1	0.03	0.04	0.4	0.4	5	1	67.016	0.091
10	0.9	0.8	1	1	0.03	0.04	0.4	0	5	1	97.965	0.0816
10	0.9	0.1	1	1	0.03	0.04	0.4	0.9	5	1	48.934	0.2563
10	0.9	0.7	1	1	0.03	0.04	0.4	0.7	5	1	80.299	0.0994
10	0.9	0.2	1	1	0.03	0.04	0.4	0.5	5	1	47.877	0.1297
10	0.9	0.8	1	1	0.03	0.04	0.4	0.2	5	1	101.06	0.0872
10	0.9	0.01	1	1	0.03	0.04	0.4	0.1	5	1	37.967	0.0952
10	0.9	0.5	1	1	0.03	0.04	0.4	0.9	5	1	61.114	0.1269
10	0.9	0.7	1	1	0.03	0.04	0.4	0.8	5	1	84.176	0.1116
10	0.9	0.2	1	1	0.03	0.04	0.4	0.4	5	1	45.678	0.1114
10	0.9	0.7	1	1	0.03	0.04	0.4	0.5	5	1	78.4	0.0909
10	0.8	0.6	1	1	0.03	0.04	0.4	0.2	5	1	60.058	0.0887
10	0.9	0.9	1	1	0.03	0.04	0.4	0	5	1	145.07	0.0984
10	0.9	0.3	1	1	0.03	0.04	0.4	0.2	5	1	46.469	0.0855
10	0.99	0.2	1	1	0.03	0.04	0.4	0.9	5	1	52.433	0.1998
10	0.9	0.7	1	1	0.03	0.04	0.4	0.4	5	1	79.043	0.0932
10	0.9	0.3	1	1	0.03	0.04	0.4	0.8	5	1	52.385	0.1473
10	0.9	0.01	1	1	0.03	0.04	0.4	0.9	5	1	44.629	0.4324
10	0.8	0.5	1	1	0.03	0.04	0.4	0.5	5	1	56.006	0.104
10	0.9	0.99	1	1	0.03	0.04	0.4	0.3	5	1	255.05	0.1212
10	0.9	0.2	1	1	0.03	0.04	0.4	0.9	5	1	51.286	0.2049
10	0.8	0.7	1	1	0.03	0.04	0.4	0.9	5	1	70.131	0.1098
10	0.9	0.3	1	1	0.03	0.04	0.4	0.4	5	1	48.61	0.101
10	0.9	0.9	1	1	0.03	0.04	0.4	0.7	5	1	144.08	0.1053
10	0.9	0.9	1	1	0.03	0.04	0.4	0.3	5	1	142.51	0.1035
10	0.9	0.4	1	1	0.03	0.04	0.4	0.7	5	1	55.291	0.1256
10	0.9	0.9	1	1	0.03	0.04	0.4	0.9	5	1	142.85	0.1003
10	0.8	0.5	1	1	0.03	0.04	0.4	0.6	5	1	55.174	0.1044
10	0.8	0.3	1	1	0.03	0.04	0.4	0.7	5	1	50.095	0.1321
10	0.9	0.5	1	1	0.03	0.04	0.4	0.7	5	1	61.295	0.1129
10	0.9	0.1	1	1	0.03	0.04	0.4	0.4	5	1	44.227	0.1332
10	0.9	0.01	1	1	0.03	0.04	0.4	0.8	5	1	45.138	0.3727
10	0.9	0.4	1	1	0.03	0.04	0.4	0.6	5	1	54.533	0.1202
10	0.9	0.2	1	1	0.03	0.04	0.4	0.1	5	1	42.148	0.0778
10	0.9	0.3	1	1	0.03	0.04	0.4	0.3	5	1	47.417	0.0935
10	0.9	0.7	1	1	0.03	0.04	0.4	0.3	5	1	75.849	0.0836
10	0.9	0.01	1	1	0.03	0.04	0.4	0.6	5	1	45.408	0.2776
10	0.9	0.8	1	1	0.03	0.04	0.4	0.6	5	1	102.48	0.103
10	0.9	0.8	1	1	0.03	0.04	0.4	0.4	5	1	100.55	0.0861
10	0.9	0.1	1	1	0.03	0.04	0.4	0.8	5	1	47.826	0.2165
10	0.9	0.9	1	1	0.03	0.04	0.4	0.8	5	1	138.75	0.0958
10	0.8	0.1	1	1	0.03	0.04	0.4	0	5	1	39.092	0.0791
10	0.9	0.4	1	1	0.03	0.04	0.4	0	5	1	49.19	0.0731
10	0.8	0.2	1	1	0.03	0.04	0.4	0.5	5	1	45.531	0.1264
10	0.9	0.01	1	1	0.03	0.04	0.4	0.5	5	1	43.05	0.2219
10	0.9	0.8	1	1	0.03	0.04	0.4	0.9	5	1	103.38	0.1071
10	0.9	0.8	1	1	0.03	0.04	0.4	0.3	5	1	99.714	0.0928
10	0.9	0.3	1	1	0.03	0.04	0.4	0.5	5	1	49.09	0.1094
10	0.8	0.2	1	1	0.03	0.04	0.4	0.9	5	1	50.253	0.1918
10	0.9	0.6	1	1	0.03	0.04	0.4	0.2	5	1	65.006	0.0818
10	0.9	0.3	1	1	0.03	0.04	0.4	0.7	5	1	52.103	0.1339
10	0.8	0.1	1	1	0.03	0.04	0.4	0.9	5	1	48.54	0.2331
10	0.9	0.1	1	1	0.03	0.04	0.4	0.6	5	1	45.919	0.1694
10	0.9	0.1	1	1	0.03	0.04	0.4	0.7	5	1	47.405	0.1954
10	0.9	0.2	1	1	0.03	0.04	0.4	0.6	5	1	47.662	0.1437
10	0.8	0.6	1	1	0.03	0.04	0.4	0.9	5	1	62.651	0.1071
10	0.9	0.2	1	1	0.03	0.04	0.4	0.3	5	1	44.182	0.1024
10	0.9	0.4	1	1	0.03	0.04	0.4	0.8	5	1	55.996	0.1327
10	0.8	0.4	1	1	0.03	0.04	0.4	0.8	5	1	53.832	0.1343
10	0.9	0.6	1	1	0.03	0.04	0.4	0.6	5	1	68.123	0.1022
10	0.9	0.5	1	1	0.03	0.04	0.4	0.8	5	1	62.05	0.1262
10	0.8	0.01	1	1	0.03	0.04	0.4	0.3	5	1	42.108	0.1597
10	0.8	0.5	1	1	0.03	0.04	0.4	0.1	5	1	53.342	0.0859
10	0.9	0.4	1	1	0.03	0.04	0.4	0.2	5	1	51.5	0.0847
10	0.8	0.7	1	1	0.03	0.04	0.4	0.7	5	1	70.746	0.1062
10	0.8	0.6	1	1	0.03	0.04	0.4	0.6	5	1	62.092	0.1083
10	0.9	0.01	1	1	0.03	0.04	0.4	0.3	5	1	41.781	0.1539
10	0.9	0.01	1	1	0.03	0.04	0.4	0.4	5	1	42.89	0.1908
10	0.9	0.8	1	1	0.03	0.04	0.4	0.8	5	1	100.62	0.1049
10	0.8	0.01	1	1	0.03	0.04	0.4	0.5	5	1	44.221	0.2208
10	0.8	0.6	1	1	0.03	0.04	0.4	0.8	5	1	62.233	0.1057
10	0.8	0.2	1	1	0.03	0.04	0.4	0	5	1	40.626	0.0801
10	0.9	0.3	1	1	0.03	0.04	0.4	0	5	1	45.176	0.0725
10	0.8	0.99	1	1	0.03	0.04	0.4	0.2	5	1	137.17	0.1434
10	0.8	0.6	1	1	0.03	0.04	0.4	0.5	5	1	60.971	0.1025
10	0.8	0.3	1	1	0.03	0.04	0.4	0.9	5	1	51.501	0.1619
10	0.9	0.01	1	1	0.03	0.04	0.4	0.7	5	1	45.124	0.3233
10	0.8	0.2	1	1	0.03	0.04	0.4	0.4	5	1	44.261	0.1139
10	0.8	0.8	1	1	0.03	0.04	0.4	0.8	5	1	81.027	0.0978
10	0.8	0.9	1	1	0.03	0.04	0.4	0.9	5	1	100.68	0.1022
10	0.8	0.2	1	1	0.03	0.04	0.4	0.7	5	1	48.382	0.1565
10	0.8	0.3	1	1	0.03	0.04	0.4	0.2	5	1	46.245	0.095
10	0.8	0.6	1	1	0.03	0.04	0.4	0.4	5	1	61.126	0.0977
10	0.8	0.6	1	1	0.03	0.04	0.4	0.3	5	1	61.292	0.094
10	0.8	0.3	1	1	0.03	0.04	0.4	0.3	5	1	47.858	0.1039
10	0.8	0.99	1	1	0.03	0.04	0.4	0.4	5	1	134.57	0.1292
10	0.8	0.8	1	1	0.03	0.04	0.4	0	5	1	80.715	0.0997
10	0.8	0.01	1	1	0.03	0.04	0.4	0.6	5	1	45.281	0.2679
10	0.8	0.3	1	1	0.03	0.04	0.4	0	5	1	44.642	0.0804
10	0.8	0.4	1	1	0.03	0.04	0.4	0.5	5	1	50.76	0.1047
10	0.8	0.6	1	1	0.03	0.04	0.4	0	5	1	60.599	0.0858
10	0.8	0.8	1	1	0.03	0.04	0.4	0.1	5	1	80.702	0.0996
10	0.8	0.9	1	1	0.03	0.04	0.4	0	5	1	104.67	0.1191
10	0.9	0.9	1	1	0.03	0.04	0.4	0.6	5	1	142.82	0.1011
10	0.9	0.9	1	1	0.03	0.04	0.4	0.5	5	1	142.57	0.101
10	0.8	0.1	1	1	0.03	0.04	0.4	0.3	5	1	42.785	0.1237
10	0.8	0.8	1	1	0.03	0.04	0.4	0.3	5	1	80.544	0.0978
10	0.8	0.1	1	1	0.03	0.04	0.4	0.2	5	1	41.237	0.1116
10	0.7	0.99	1	1	0.03	0.04	0.4	0.3	5	1	97.921	0.148
10	0.8	0.5	1	1	0.03	0.04	0.4	0	5	1	53.483	0.0846
10	0.9	0.01	1	1	0.03	0.04	0.4	0.2	5	1	40.697	0.1281
10	0.8	0.6	1	1	0.03	0.04	0.4	0.7	5	1	60.27	0.1036
10	0.7	0.9	1	1	0.03	0.04	0.4	0.4	5	1	78.34	0.1141
10	0.8	0.8	1	1	0.03	0.04	0.4	0.9	5	1	82.541	0.1024
10	0.8	0.01	1	1	0.03	0.04	0.4	0	5	1	38.128	0.0897
10	0.8	0.3	1	1	0.03	0.04	0.4	0.8	5	1	50.722	0.1452
10	0.9	0.9	1	1	0.03	0.04	0.4	0.4	5	1	149.55	0.1042
10	0.8	0.01	1	1	0.03	0.04	0.4	0.8	5	1	47.112	0.3675
10	0.8	0.3	1	1	0.03	0.04	0.4	0.5	5	1	47.047	0.1104
10	0.8	0.8	1	1	0.03	0.04	0.4	0.5	5	1	81.029	0.0962
10	0.7	0.7	1	1	0.03	0.04	0.4	0.4	5	1	61.584	0.1024
10	0.7	0.7	1	1	0.03	0.04	0.4	0	5	1	60.351	0.0999
10	0.8	0.2	1	1	0.03	0.04	0.4	0.8	5	1	49.246	0.1735
10	0.8	0.8	1	1	0.03	0.04	0.4	0.4	5	1	78.53	0.0959
10	0.7	0.8	1	1	0.03	0.04	0.4	0.3	5	1	68.077	0.1083
10	0.9	0.2	1	1	0.03	0.04	0.4	0.8	5	1	49.023	0.1707
10	0.8	0.2	1	1	0.03	0.04	0.4	0.3	5	1	43.869	0.1063
10	0.7	0.99	1	1	0.03	0.04	0.4	0.8	5	1	94.87	0.1162
10	0.9	0.99	1	1	0.03	0.04	0.4	0.1	5	1	253.81	0.1307
10	0.8	0.01	1	1	0.03	0.04	0.4	0.9	5	1	46.3	0.4131
10	0.8	0.8	1	1	0.03	0.04	0.4	0.6	5	1	80.092	0.0984
10	0.7	0.8	1	1	0.03	0.04	0.4	0.2	5	1	69.062	0.1095
10	0.7	0.9	1	1	0.03	0.04	0.4	0.6	5	1	78.579	0.1053
10	0.8	0.1	1	1	0.03	0.04	0.4	0.1	5	1	40.338	0.0949
10	0.8	0.9	1	1	0.03	0.04	0.4	0.1	5	1	99.789	0.112
10	0.8	0.7	1	1	0.03	0.04	0.4	0.8	5	1	70.174	0.1098
10	0.8	0.7	1	1	0.03	0.04	0.4	0	5	1	68.889	0.0932
10	0.8	0.99	1	1	0.03	0.04	0.4	0.8	5	1	130.58	0.1147
10	0.8	0.5	1	1	0.03	0.04	0.4	0.4	5	1	56.057	0.1036
10	0.8	0.99	1	1	0.03	0.04	0.4	0.5	5	1	137.24	0.1277
10	0.8	0.5	1	1	0.03	0.04	0.4	0.3	5	1	54.002	0.0964
10	0.7	0.6	1	1	0.03	0.04	0.4	0.5	5	1	56.346	0.0991
10	0.8	0.99	1	1	0.03	0.04	0.4	0	5	1	144.35	0.1593
10	0.7	0.5	1	1	0.03	0.04	0.4	0.4	5	1	51.965	0.1016
10	0.9	0.99	1	1	0.03	0.04	0.4	0.8	5	1	245.06	0.1043
10	0.8	0.4	1	1	0.03	0.04	0.4	0	5	1	48.712	0.0813
10	0.9	0.99	1	1	0.03	0.04	0.4	0.6	5	1	243.95	0.1082
10	0.8	0.3	1	1	0.03	0.04	0.4	0.4	5	1	46.74	0.1067
10	0.8	0.5	1	1	0.03	0.04	0.4	0.2	5	1	52.885	0.0886
10	0.9	0.99	1	1	0.03	0.04	0.4	0	5	1	257.13	0.1353
10	0.8	0.01	1	1	0.03	0.04	0.4	0.1	5	1	39.72	0.1067
10	0.7	0.2	1	1	0.03	0.04	0.4	0.6	5	1	46.091	0.1452
10	0.7	0.01	1	1	0.03	0.04	0.4	0	5	1	38.089	0.0909
10	0.8	0.9	1	1	0.03	0.04	0.4	0.8	5	1	102.65	0.1028
10	0.9	0.01	1	1	0.03	0.04	0.4	0	5	1	36.643	0.0779
10	0.7	0.5	1	1	0.03	0.04	0.4	0.3	5	1	50.898	0.1005
10	0.8	0.8	1	1	0.03	0.04	0.4	0.2	5	1	79.589	0.0966
10	0.7	0.3	1	1	0.03	0.04	0.4	0.6	5	1	46.966	0.1226
10	0.7	0.4	1	1	0.03	0.04	0.4	0.9	5	1	51.75	0.133
10	0.7	0.1	1	1	0.03	0.04	0.4	0.3	5	1	41.746	0.1159
10	0.7	0.6	1	1	0.03	0.04	0.4	0.2	5	1	54.642	0.0953
10	0.7	0.99	1	1	0.03	0.04	0.4	0.6	5	1	95.458	0.1289
10	0.8	0.7	1	1	0.03	0.04	0.4	0.6	5	1	69.428	0.0971
10	0.7	0.5	1	1	0.03	0.04	0.4	0.8	5	1	53.579	0.1107
10	0.7	0.6	1	1	0.03	0.04	0.4	0.8	5	1	57.874	0.1012
10	0.7	0.2	1	1	0.03	0.04	0.4	0.8	5	1	47.522	0.1664
10	0.7	0.5	1	1	0.03	0.04	0.4	0.1	5	1	50.957	0.092
10	0.8	0.01	1	1	0.03	0.04	0.4	0.7	5	1	46.874	0.318
10	0.8	0.8	1	1	0.03	0.04	0.4	0.7	5	1	81.346	0.1011
10	0.8	0.9	1	1	0.03	0.04	0.4	0.5	5	1	101.72	0.1079
10	0.7	0.9	1	1	0.03	0.04	0.4	0.8	5	1	79.082	0.1058
10	0.8	0.4	1	1	0.03	0.04	0.4	0.7	5	1	51.98	0.1245
10	0.8	0.5	1	1	0.03	0.04	0.4	0.7	5	1	57.194	0.1119
10	0.8	0.01	1	1	0.03	0.04	0.4	0.4	5	1	45.315	0.2002
10	0.8	0.3	1	1	0.03	0.04	0.4	0.6	5	1	48.459	0.1255
10	0.7	0.99	1	1	0.03	0.04	0.4	0	5	1	102.9	0.1748
10	0.8	0.2	1	1	0.03	0.04	0.4	0.2	5	1	42.418	0.0965
10	0.8	0.99	1	1	0.03	0.04	0.4	0.9	5	1	131.2	0.1065
10	0.7	0.6	1	1	0.03	0.04	0.4	0.1	5	1	55.593	0.0973
10	0.7	0.9	1	1	0.03	0.04	0.4	0.5	5	1	81.55	0.1116
10	0.7	0.7	1	1	0.03	0.04	0.4	0.5	5	1	60.722	0.0958
10	0.7	0.5	1	1	0.03	0.04	0.4	0	5	1	51.288	0.0892
10	0.7	0.2	1	1	0.03	0.04	0.4	0.1	5	1	41.727	0.0862
10	0.7	0.99	1	1	0.03	0.04	0.4	0.1	5	1	101.41	0.1637
10	0.8	0.99	1	1	0.03	0.04	0.4	0.6	5	1	133.05	0.1171
10	0.8	0.4	1	1	0.03	0.04	0.4	0.2	5	1	48.487	0.0897
10	0.7	0.8	1	1	0.03	0.04	0.4	0.5	5	1	69.041	0.1035
10	0.8	0.4	1	1	0.03	0.04	0.4	0.3	5	1	49.511	0.0951
10	0.7	0.5	1	1	0.03	0.04	0.4	0.6	5	1	52.275	0.1047
10	0.7	0.9	1	1	0.03	0.04	0.4	0.3	5	1	80.167	0.1182
10	0.7	0.2	1	1	0.03	0.04	0.4	0	5	1	42.172	0.0882
10	0.6	0.9	1	1	0.03	0.04	0.4	0.1	5	1	69.019	0.1434
10	0.7	0.6	1	1	0.03	0.04	0.4	0.9	5	1	56.616	0.1059
10	0.7	0.9	1	1	0.03	0.04	0.4	0.7	5	1	79.65	0.1093
10	0.6	0.6	1	1	0.03	0.04	0.4	0.4	5	1	53.761	0.1031
10	0.6	0.8	1	1	0.03	0.04	0.4	0.5	5	1	59.425	0.1074
10	0.7	0.99	1	1	0.03	0.04	0.4	0.7	5	1	93.458	0.1201
10	0.7	0.4	1	1	0.03	0.04	0.4	0	5	1	48.03	0.0875
10	0.7	0.1	1	1	0.03	0.04	0.4	0.5	5	1	43.615	0.1408
10	0.7	0.01	1	1	0.03	0.04	0.4	0.3	5	1	42.272	0.1577
10	0.7	0.8	1	1	0.03	0.04	0.4	0.1	5	1	69.367	0.1081
10	0.7	0.1	1	1	0.03	0.04	0.4	0.2	5	1	40.984	0.1009
10	0.9	0.99	1	1	0.03	0.04	0.4	0.5	5	1	251.15	0.1184
10	0.7	0.8	1	1	0.03	0.04	0.4	0	5	1	70.933	0.1134
10	0.7	0.1	1	1	0.03	0.04	0.4	0.6	5	1	45.459	0.1702
10	0.9	0.99	1	1	0.03	0.04	0.4	0.2	5	1	255.19	0.1223
10	0.6	0.8	1	1	0.03	0.04	0.4	0.7	5	1	60.453	0.1034
10	0.7	0.4	1	1	0.03	0.04	0.4	0.8	5	1	49.16	0.1172
10	0.7	0.6	1	1	0.03	0.04	0.4	0.6	5	1	55.078	0.0973
10	0.7	0.5	1	1	0.03	0.04	0.4	0.2	5	1	51.73	0.095
10	0.7	0.3	1	1	0.03	0.04	0.4	0.5	5	1	46.833	0.1134
10	0.6	0.99	1	1	0.03	0.04	0.4	0.7	5	1	73.262	0.1198
10	0.7	0.1	1	1	0.03	0.04	0.4	0	5	1	39.314	0.0853
10	0.8	0.99	1	1	0.03	0.04	0.4	0.3	5	1	140.48	0.1435
10	0.7	0.7	1	1	0.03	0.04	0.4	0.1	5	1	61.778	0.1036
10	0.6	0.9	1	1	0.03	0.04	0.4	0	5	1	68.055	0.1346
10	0.8	0.9	1	1	0.03	0.04	0.4	0.4	5	1	101.55	0.1066
10	0.7	0.9	1	1	0.03	0.04	0.4	0.2	5	1	81.152	0.1261
10	0.8	0.1	1	1	0.03	0.04	0.4	0.6	5	1	45.054	0.169
10	0.6	0.99	1	1	0.03	0.04	0.4	0	5	1	82.03	0.1857
10	0.7	0.5	1	1	0.03	0.04	0.4	0.9	5	1	53.467	0.1197
10	0.8	0.9	1	1	0.03	0.04	0.4	0.2	5	1	102.22	0.1146
10	0.6	0.4	1	1	0.03	0.04	0.4	0.6	5	1	47.583	0.112
10	0.8	0.9	1	1	0.03	0.04	0.4	0.3	5	1	103.32	0.1143
10	0.7	0.6	1	1	0.03	0.04	0.4	0.4	5	1	56.161	0.0989
10	0.8	0.3	1	1	0.03	0.04	0.4	0.1	5	1	44.999	0.0893
10	0.7	0.7	1	1	0.03	0.04	0.4	0.8	5	1	61.676	0.0975
10	0.6	0.7	1	1	0.03	0.04	0.4	0.5	5	1	55.41	0.0996
10	0.8	0.4	1	1	0.03	0.04	0.4	0.4	5	1	50.369	0.1006
10	0.8	0.7	1	1	0.03	0.04	0.4	0.3	5	1	71.5	0.0961
10	0.8	0.1	1	1	0.03	0.04	0.4	0.4	5	1	44.201	0.1384
10	0.8	0.1	1	1	0.03	0.04	0.4	0.5	5	1	44.791	0.147
10	0.7	0.6	1	1	0.03	0.04	0.4	0.7	5	1	56.251	0.1061
10	0.8	0.5	1	1	0.03	0.04	0.4	0.9	5	1	57.416	0.1242
10	0.6	0.6	1	1	0.03	0.04	0.4	0.3	5	1	52.582	0.1042
10	0.7	0.01	1	1	0.03	0.04	0.4	0.6	5	1	45.809	0.258
10	0.8	0.4	1	1	0.03	0.04	0.4	0.6	5	1	51.762	0.1168
10	0.8	0.99	1	1	0.03	0.04	0.4	0.7	5	1	133.78	0.1101
10	0.8	0.7	1	1	0.03	0.04	0.4	0.5	5	1	69.696	0.0979
10	0.6	0.8	1	1	0.03	0.04	0.4	0.1	5	1	59.506	0.1164
10	0.6	0.99	1	1	0.03	0.04	0.4	0.9	5	1	71.416	0.1011
10	0.7	0.6	1	1	0.03	0.04	0.4	0.3	5	1	54.03	0.0978
10	0.6	0.8	1	1	0.03	0.04	0.4	0.3	5	1	58.837	0.11
10	0.6	0.6	1	1	0.03	0.04	0.4	0.8	5	1	51.276	0.1034
10	0.8	0.7	1	1	0.03	0.04	0.4	0.4	5	1	71.518	0.0988
10	0.7	0.4	1	1	0.03	0.04	0.4	0.1	5	1	47.604	0.0912
10	0.7	0.8	1	1	0.03	0.04	0.4	0.7	5	1	67.341	0.0969
10	0.8	0.9	1	1	0.03	0.04	0.4	0.7	5	1	98.602	0.1034
10	0.7	0.2	1	1	0.03	0.04	0.4	0.3	5	1	44.233	0.1066
10	0.6	0.5	1	1	0.03	0.04	0.4	0.1	5	1	49.646	0.0975
10	0.8	0.9	1	1	0.03	0.04	0.4	0.6	5	1	99.973	0.1044
10	0.8	0.7	1	1	0.03	0.04	0.4	0.1	5	1	69.068	0.0932
10	0.7	0.2	1	1	0.03	0.04	0.4	0.2	5	1	42.433	0.0987
10	0.9	0.99	1	1	0.03	0.04	0.4	0.4	5	1	256.33	0.1198
10	0.6	0.7	1	1	0.03	0.04	0.4	0.3	5	1	55.231	0.1063
10	0.7	0.2	1	1	0.03	0.04	0.4	0.5	5	1	45.941	0.1258
10	0.7	0.8	1	1	0.03	0.04	0.4	0.9	5	1	69.483	0.0964
10	0.8	0.7	1	1	0.03	0.04	0.4	0.2	5	1	70.507	0.0937
10	0.6	0.2	1	1	0.03	0.04	0.4	0.3	5	1	44.107	0.1154
10	0.6	0.2	1	1	0.03	0.04	0.4	0.2	5	1	43.511	0.106
10	0.7	0.1	1	1	0.03	0.04	0.4	0.1	5	1	40.223	0.0964
10	0.7	0.4	1	1	0.03	0.04	0.4	0.6	5	1	48.627	0.1093
10	0.6	0.5	1	1	0.03	0.04	0.4	0.2	5	1	49.893	0.0992
10	0.6	0.7	1	1	0.03	0.04	0.4	0.7	5	1	54.983	0.0963
10	0.6	0.6	1	1	0.03	0.04	0.4	0.6	5	1	53.459	0.103
10	0.7	0.4	1	1	0.03	0.04	0.4	0.7	5	1	50.27	0.1225
10	0.6	0.4	1	1	0.03	0.04	0.4	0.8	5	1	48.261	0.1164
10	0.8	0.5	1	1	0.03	0.04	0.4	0.8	5	1	56.456	0.115
10	0.6	0.9	1	1	0.03	0.04	0.4	0.8	5	1	63.638	0.0966
10	0.7	0.8	1	1	0.03	0.04	0.4	0.8	5	1	68.16	0.0961
10	0.7	0.4	1	1	0.03	0.04	0.4	0.3	5	1	49.342	0.0977
10	0.6	0.2	1	1	0.03	0.04	0.4	0.9	5	1	46.156	0.1593
10	0.6	0.5	1	1	0.03	0.04	0.4	0.3	5	1	49.107	0.0954
10	0.7	0.2	1	1	0.03	0.04	0.4	0.4	5	1	44.635	0.1194
10	0.8	0.01	1	1	0.03	0.04	0.4	0.2	5	1	39.517	0.126
10	0.6	0.3	1	1	0.03	0.04	0.4	0.6	5	1	45.212	0.1183
10	0.7	0.3	1	1	0.03	0.04	0.4	0	5	1	42.816	0.0824
10	0.7	0.01	1	1	0.03	0.04	0.4	0.5	5	1	46.417	0.222
10	0.8	0.1	1	1	0.03	0.04	0.4	0.8	5	1	47.018	0.2155
10	0.6	0.5	1	1	0.03	0.04	0.4	0.4	5	1	48.288	0.1001
10	0.6	0.1	1	1	0.03	0.04	0.4	0.2	5	1	41.801	0.1128
10	0.6	0.2	1	1	0.03	0.04	0.4	0.5	5	1	44.623	0.1267
10	0.6	0.6	1	1	0.03	0.04	0.4	0	5	1	51.751	0.1002
10	0.7	0.9	1	1	0.03	0.04	0.4	0.9	5	1	78.774	0.0988
10	0.6	0.9	1	1	0.03	0.04	0.4	0.6	5	1	65.023	0.1036
10	0.8	0.6	1	1	0.03	0.04	0.4	0.1	5	1	60.048	0.0893
10	0.6	0.4	1	1	0.03	0.04	0.4	0.3	5	1	47.679	0.0974
10	0.7	0.99	1	1	0.03	0.04	0.4	0.5	5	1	94.903	0.1291
10	0.7	0.3	1	1	0.03	0.04	0.4	0.4	5	1	47.457	0.113
10	0.7	0.3	1	1	0.03	0.04	0.4	0.7	5	1	49.443	0.1301
10	0.7	0.7	1	1	0.03	0.04	0.4	0.7	5	1	62.454	0.0999
10	0.6	0.7	1	1	0.03	0.04	0.4	0.4	5	1	55.295	0.1039
10	0.6	0.8	1	1	0.03	0.04	0.4	0	5	1	60.519	0.1143
10	0.7	0.99	1	1	0.03	0.04	0.4	0.4	5	1	94.895	0.1377
10	0.8	0.99	1	1	0.03	0.04	0.4	0.1	5	1	136.51	0.1467
10	0.9	0.99	1	1	0.03	0.04	0.4	0.7	5	1	248.09	0.1085
10	0.7	0.3	1	1	0.03	0.04	0.4	0.8	5	1	49.133	0.1446
10	0.99	0.99	1	1	0.03	0.04	0.4	0.7	5	1	1294.1	0.0988
10	0.6	0.8	1	1	0.03	0.04	0.4	0.6	5	1	59.717	0.101
10	0.6	0.01	1	1	0.03	0.04	0.4	0.7	5	1	46.845	0.2825
10	0.6	0.6	1	1	0.03	0.04	0.4	0.7	5	1	52.472	0.1042
10	0.6	0.5	1	1	0.03	0.04	0.4	0	5	1	48.567	0.096
10	0.7	0.4	1	1	0.03	0.04	0.4	0.2	5	1	48.575	0.0936
10	0.6	0.99	1	1	0.03	0.04	0.4	0.4	5	1	77.306	0.1442
10	0.6	0.2	1	1	0.03	0.04	0.4	0.1	5	1	41.916	0.095
10	0.7	0.9	1	1	0.03	0.04	0.4	0.1	5	1	81.072	0.1229
10	0.6	0.9	1	1	0.03	0.04	0.4	0.3	5	1	67.207	0.1225
10	0.6	0.3	1	1	0.03	0.04	0.4	0.8	5	1	47.567	0.1315
10	0.6	0.7	1	1	0.03	0.04	0.4	0.8	5	1	54.28	0.0956
10	0.6	0.9	1	1	0.03	0.04	0.4	0.2	5	1	68.165	0.1347
10	0.6	0.9	1	1	0.03	0.04	0.4	0.9	5	1	63.483	0.0872
10	0.6	0.2	1	1	0.03	0.04	0.4	0.8	5	1	46.817	0.1495
10	0.7	0.8	1	1	0.03	0.04	0.4	0.6	5	1	66.93	0.0996
10	0.6	0.99	1	1	0.03	0.04	0.4	0.8	5	1	73.932	0.114
10	0.6	0.01	1	1	0.03	0.04	0.4	0	5	1	38.848	0.0904
10	0.6	0.4	1	1	0.03	0.04	0.4	0.7	5	1	48.145	0.114
10	0.7	0.1	1	1	0.03	0.04	0.4	0.8	5	1	48.295	0.2024
10	0.8	0.4	1	1	0.03	0.04	0.4	0.9	5	1	53.917	0.1359
10	0.7	0.2	1	1	0.03	0.04	0.4	0.9	5	1	49.622	0.1826
10	0.6	0.1	1	1	0.03	0.04	0.4	0.1	5	1	41.471	0.1045
10	0.6	0.5	1	1	0.03	0.04	0.4	0.9	5	1	49.991	0.1091
10	0.6	0.5	1	1	0.03	0.04	0.4	0.8	5	1	50.275	0.1067
10	0.7	0.1	1	1	0.03	0.04	0.4	0.7	5	1	45.593	0.1813
10	0.7	0.9	1	1	0.03	0.04	0.4	0	5	1	83.061	0.1351
10	0.6	0.3	1	1	0.03	0.04	0.4	0	5	1	43.273	0.0907
10	0.6	0.5	1	1	0.03	0.04	0.4	0.6	5	1	49.097	0.0977
10	0.6	0.99	1	1	0.03	0.04	0.4	0.6	5	1	74.465	0.1264
10	0.8	0.2	1	1	0.03	0.04	0.4	0.1	5	1	43.111	0.0838
10	0.6	0.3	1	1	0.03	0.04	0.4	0.1	5	1	44.038	0.0978
10	0.7	0.8	1	1	0.03	0.04	0.4	0.4	5	1	69.88	0.1099
10	0.6	0.3	1	1	0.03	0.04	0.4	0.7	5	1	47.095	0.1258
10	0.6	0.99	1	1	0.03	0.04	0.4	0.5	5	1	78.048	0.1396
10	0.5	0.99	1	1	0.03	0.04	0.4	0.7	5	1	62.03	0.1177
10	0.7	0.5	1	1	0.03	0.04	0.4	0.7	5	1	52.076	0.1043
10	0.7	0.1	1	1	0.03	0.04	0.4	0.9	5	1	47.931	0.2232
10	0.6	0.7	1	1	0.03	0.04	0.4	0.6	5	1	55.408	0.1042
10	0.6	0.1	1	1	0.03	0.04	0.4	0.9	5	1	47.917	0.2161
10	0.7	0.4	1	1	0.03	0.04	0.4	0.4	5	1	47.835	0.0984
10	0.6	0.99	1	1	0.03	0.04	0.4	0.3	5	1	78.613	0.1586
10	0.7	0.7	1	1	0.03	0.04	0.4	0.2	5	1	60.938	0.0943
10	0.6	0.5	1	1	0.03	0.04	0.4	0.7	5	1	49.219	0.106
10	0.6	0.1	1	1	0.03	0.04	0.4	0.4	5	1	42.211	0.1273
10	0.7	0.4	1	1	0.03	0.04	0.4	0.5	5	1	48.352	0.105
10	0.8	0.2	1	1	0.03	0.04	0.4	0.6	5	1	47.462	0.1395
10	0.7	0.1	1	1	0.03	0.04	0.4	0.4	5	1	43.565	0.1352
10	0.7	0.5	1	1	0.03	0.04	0.4	0.5	5	1	52.474	0.1064
10	0.6	0.4	1	1	0.03	0.04	0.4	0.4	5	1	47.294	0.1028
10	0.7	0.7	1	1	0.03	0.04	0.4	0.9	5	1	61.531	0.1036
10	0.6	0.6	1	1	0.03	0.04	0.4	0.5	5	1	51.811	0.0997
10	0.5	0.99	1	1	0.03	0.04	0.4	0	5	1	68.021	0.1892
10	0.6	0.1	1	1	0.03	0.04	0.4	0.8	5	1	46.939	0.1925
10	0.7	0.01	1	1	0.03	0.04	0.4	0.4	5	1	43.825	0.1893
10	0.6	0.1	1	1	0.03	0.04	0.4	0.3	5	1	42.568	0.1163
10	0.6	0.3	1	1	0.03	0.04	0.4	0.2	5	1	44.629	0.0979
10	0.7	0.01	1	1	0.03	0.04	0.4	0.2	5	1	39.982	0.1264
10	0.7	0.6	1	1	0.03	0.04	0.4	0	5	1	55.611	0.0957
10	0.6	0.4	1	1	0.03	0.04	0.4	0.2	5	1	46.191	0.1002
10	0.6	0.1	1	1	0.03	0.04	0.4	0.5	5	1	45.171	0.1469
10	0.6	0.3	1	1	0.03	0.04	0.4	0.3	5	1	45.167	0.1014
10	0.5	0.99	1	1	0.03	0.04	0.4	0.2	5	1	67.078	0.1682
10	0.6	0.01	1	1	0.03	0.04	0.4	0.5	5	1	45.382	0.2149
10	0.5	0.2	1	1	0.03	0.04	0.4	0.4	5	1	42.772	0.1073
10	0.5	0.8	1	1	0.03	0.04	0.4	0	5	1	55.071	0.1324
10	0.7	0.3	1	1	0.03	0.04	0.4	0.3	5	1	47.004	0.1083
10	0.5	0.1	1	1	0.03	0.04	0.4	0.4	5	1	44.046	0.1275
10	0.6	0.01	1	1	0.03	0.04	0.4	0.3	5	1	42.906	0.153
10	0.6	0.01	1	1	0.03	0.04	0.4	0.1	5	1	39.763	0.1141
10	0.6	0.4	1	1	0.03	0.04	0.4	0.5	5	1	47.864	0.1075
10	0.5	0.1	1	1	0.03	0.04	0.4	0.5	5	1	44.297	0.1401
10	0.5	0.1	1	1	0.03	0.04	0.4	0.6	5	1	44.838	0.1516
10	0.6	0.3	1	1	0.03	0.04	0.4	0.4	5	1	45.58	0.1082
10	0.6	0.3	1	1	0.03	0.04	0.4	0.5	5	1	45.942	0.1182
10	0.5	0.5	1	1	0.03	0.04	0.4	0.5	5	1	46.303	0.0991
10	0.8	0.4	1	1	0.03	0.04	0.4	0.1	5	1	49.385	0.0859
10	0.6	0.3	1	1	0.03	0.04	0.4	0.9	5	1	48.271	0.1405
10	0.6	0.01	1	1	0.03	0.04	0.4	0.6	5	1	46.011	0.2458
10	0.5	0.6	1	1	0.03	0.04	0.4	0	5	1	49.034	0.1038
10	0.5	0.99	1	1	0.03	0.04	0.4	0.5	5	1	63.413	0.1369
10	0.5	0.8	1	1	0.03	0.04	0.4	0.7	5	1	50.852	0.0944
10	0.5	0.8	1	1	0.03	0.04	0.4	0.8	5	1	51.063	0.0931
10	0.4	0.9	1	1	0.03	0.04	0.4	0.5	5	1	50.422	0.1109
10	0.5	0.99	1	1	0.03	0.04	0.4	0.4	5	1	62.967	0.143
10	0.5	0.4	1	1	0.03	0.04	0.4	0.8	5	1	46.713	0.1101
10	0.5	0.3	1	1	0.03	0.04	0.4	0.9	5	1	46.061	0.1239
10	0.6	0.8	1	1	0.03	0.04	0.4	0.8	5	1	57.626	0.0929
10	0.5	0.99	1	1	0.03	0.04	0.4	0.3	5	1	64.969	0.1559
10	0.6	0.99	1	1	0.03	0.04	0.4	0.2	5	1	82.767	0.1716
10	0.5	0.9	1	1	0.03	0.04	0.4	0.6	5	1	55.174	0.1035
10	0.5	0.9	1	1	0.03	0.04	0.4	0.8	5	1	54.524	0.0933
10	0.7	0.01	1	1	0.03	0.04	0.4	0.8	5	1	47.701	0.3458
10	0.7	0.01	1	1	0.03	0.04	0.4	0.9	5	1	48.001	0.4064
10	0.6	0.7	1	1	0.03	0.04	0.4	0.2	5	1	55.79	0.1033
10	0.5	0.9	1	1	0.03	0.04	0.4	0.7	5	1	55.052	0.1049
10	0.5	0.7	1	1	0.03	0.04	0.4	0.7	5	1	49.071	0.0915
10	0.5	0.4	1	1	0.03	0.04	0.4	0.9	5	1	45.441	0.1113
10	0.5	0.6	1	1	0.03	0.04	0.4	0.1	5	1	50.08	0.107
10	0.6	0.1	1	1	0.03	0.04	0.4	0.7	5	1	45.599	0.1668
10	0.5	0.6	1	1	0.03	0.04	0.4	0.8	5	1	47.617	0.0951
10	0.6	0.01	1	1	0.03	0.04	0.4	0.4	5	1	44.059	0.1785
10	0.5	0.6	1	1	0.03	0.04	0.4	0.3	5	1	48.114	0.0989
10	0.5	0.2	1	1	0.03	0.04	0.4	0.6	5	1	44.489	0.1254
10	0.4	0.7	1	1	0.03	0.04	0.4	0.1	5	1	48.718	0.1137
10	0.4	0.6	1	1	0.03	0.04	0.4	0.1	5	1	46.723	0.1083
10	0.5	0.6	1	1	0.03	0.04	0.4	0.2	5	1	49.033	0.1053
10	0.5	0.2	1	1	0.03	0.04	0.4	0.1	5	1	43.025	0.1011
10	0.7	0.7	1	1	0.03	0.04	0.4	0.3	5	1	61.996	0.1037
10	0.5	0.1	1	1	0.03	0.04	0.4	0.3	5	1	42.746	0.1182
10	0.4	0.5	1	1	0.03	0.04	0.4	0.3	5	1	44.124	0.1005
10	0.5	0.99	1	1	0.03	0.04	0.4	0.6	5	1	62.035	0.1287
10	0.4	0.7	1	1	0.03	0.04	0.4	0.9	5	1	45.7	0.0887
10	0.6	0.01	1	1	0.03	0.04	0.4	0.2	5	1	41.329	0.1282
10	0.7	0.3	1	1	0.03	0.04	0.4	0.2	5	1	45.205	0.0998
10	0.5	0.2	1	1	0.03	0.04	0.4	0.8	5	1	46.437	0.1449
10	0.4	0.7	1	1	0.03	0.04	0.4	0.7	5	1	45.284	0.0896
10	0.7	0.3	1	1	0.03	0.04	0.4	0.1	5	1	44.78	0.0925
10	0.5	0.7	1	1	0.03	0.04	0.4	0.9	5	1	49.241	0.0871
10	0.5	0.5	1	1	0.03	0.04	0.4	0.1	5	1	48.106	0.0986
10	0.5	0.99	1	1	0.03	0.04	0.4	0.9	5	1	59.609	0.0975
10	0.5	0.01	1	1	0.03	0.04	0.4	0.4	5	1	43.648	0.1744
10	0.5	0.7	1	1	0.03	0.04	0.4	0.2	5	1	50.819	0.105
10	0.4	0.9	1	1	0.03	0.04	0.4	0.2	5	1	53.663	0.1496
10	0.5	0.3	1	1	0.03	0.04	0.4	0.1	5	1	42.307	0.0918
10	0.4	0.3	1	1	0.03	0.04	0.4	0.2	5	1	43.429	0.104
10	0.4	0.8	1	1	0.03	0.04	0.4	0.5	5	1	46.74	0.0984
10	0.4	0.4	1	1	0.03	0.04	0.4	0.8	5	1	43.809	0.0994
10	0.6	0.4	1	1	0.03	0.04	0.4	0	5	1	46.518	0.0967
10	0.4	0.4	1	1	0.03	0.04	0.4	0.7	5	1	44.28	0.1027
10	0.5	0.5	1	1	0.03	0.04	0.4	0.2	5	1	47.766	0.0991
10	0.6	0.8	1	1	0.03	0.04	0.4	0.4	5	1	59.281	0.1062
10	0.5	0.8	1	1	0.03	0.04	0.4	0.3	5	1	53.407	0.1159
10	0.4	0.9	1	1	0.03	0.04	0.4	0.6	5	1	48.128	0.1017
10	0.5	0.8	1	1	0.03	0.04	0.4	0.4	5	1	53.802	0.1112
10	0.4	0.4	1	1	0.03	0.04	0.4	0.4	5	1	45.257	0.1055
10	0.4	0.8	1	1	0.03	0.04	0.4	0.4	5	1	47.644	0.1078
10	0.5	0.1	1	1	0.03	0.04	0.4	0.7	5	1	44.923	0.1659
10	0.5	0.2	1	1	0.03	0.04	0.4	0.9	5	1	46.681	0.1497
10	0.5	0.9	1	1	0.03	0.04	0.4	0.9	5	1	54.246	0.0904
10	0.4	0.6	1	1	0.03	0.04	0.4	0	5	1	47.346	0.1108
10	0.6	0.8	1	1	0.03	0.04	0.4	0.9	5	1	57.049	0.0899
10	0.5	0.5	1	1	0.03	0.04	0.4	0.4	5	1	47.367	0.1012
10	0.4	0.99	1	1	0.03	0.04	0.4	0	5	1	59.509	0.2053
10	0.6	0.2	1	1	0.03	0.04	0.4	0	5	1	42.11	0.0935
10	0.5	0.6	1	1	0.03	0.04	0.4	0.7	5	1	48.352	0.0951
10	0.4	0.6	1	1	0.03	0.04	0.4	0.6	5	1	45.704	0.0909
10	0.5	0.2	1	1	0.03	0.04	0.4	0	5	1	43.087	0.097
10	0.4	0.5	1	1	0.03	0.04	0.4	0.2	5	1	44.523	0.0998
10	0.7	0.99	1	1	0.03	0.04	0.4	0.2	5	1	100.46	0.1623
10	0.4	0.99	1	1	0.03	0.04	0.4	0.8	5	1	51.856	0.1042
10	0.4	0.99	1	1	0.03	0.04	0.4	0.9	5	1	50.987	0.0932
10	0.4	0.9	1	1	0.03	0.04	0.4	0.3	5	1	53.46	0.1369
10	0.3	0.99	1	1	0.03	0.04	0.4	0.7	5	1	46.205	0.109
10	0.4	0.3	1	1	0.03	0.04	0.4	0.4	5	1	43.433	0.1061
10	0.5	0.4	1	1	0.03	0.04	0.4	0.6	5	1	44.86	0.1053
10	0.3	0.99	1	1	0.03	0.04	0.4	0.2	5	1	51.592	0.1756
10	0.5	0.3	1	1	0.03	0.04	0.4	0	5	1	42.452	0.0953
10	0.6	0.8	1	1	0.03	0.04	0.4	0.2	5	1	60.794	0.1125
10	0.5	0.6	1	1	0.03	0.04	0.4	0.6	5	1	49.129	0.0967
10	0.4	0.2	1	1	0.03	0.04	0.4	0.8	5	1	45.584	0.1326
10	0.4	0.9	1	1	0.03	0.04	0.4	0.4	5	1	50.757	0.1218
10	0.4	0.7	1	1	0.03	0.04	0.4	0.3	5	1	46.245	0.104
10	0.5	0.5	1	1	0.03	0.04	0.4	0.3	5	1	45.98	0.0987
10	0.4	0.8	1	1	0.03	0.04	0.4	0.1	5	1	49.581	0.1207
10	0.5	0.4	1	1	0.03	0.04	0.4	0.5	5	1	46.114	0.1071
10	0.5	0.01	1	1	0.03	0.04	0.4	0.3	5	1	43.206	0.1529
10	0.4	0.7	1	1	0.03	0.04	0.4	0.2	5	1	45.801	0.107
10	0.3	0.99	1	1	0.03	0.04	0.4	0.9	5	1	44.11	0.0852
10	0.5	0.4	1	1	0.03	0.04	0.4	0.7	5	1	46.213	0.107
10	0.4	0.7	1	1	0.03	0.04	0.4	0	5	1	48.159	0.1193
10	0.6	0.7	1	1	0.03	0.04	0.4	0	5	1	54.616	0.1041
10	0.5	0.1	1	1	0.03	0.04	0.4	0.9	5	1	47.158	0.1908
10	0.3	0.9	1	1	0.03	0.04	0.4	0.9	5	1	41.654	0.0721
10	0.5	0.3	1	1	0.03	0.04	0.4	0.8	5	1	46.301	0.1239
10	0.6	0.7	1	1	0.03	0.04	0.4	0.1	5	1	56.389	0.1099
10	0.6	0.1	1	1	0.03	0.04	0.4	0	5	1	41.252	0.0925
10	0.3	0.7	1	1	0.03	0.04	0.4	0.6	5	1	42.971	0.0872
10	0.4	0.7	1	1	0.03	0.04	0.4	0.8	5	1	45.342	0.0845
10	0.4	0.5	1	1	0.03	0.04	0.4	0.6	5	1	44.77	0.0996
10	0.4	0.7	1	1	0.03	0.04	0.4	0.6	5	1	45.645	0.0972
10	0.3	0.9	1	1	0.03	0.04	0.4	0.3	5	1	46.003	0.1255
10	0.4	0.9	1	1	0.03	0.04	0.4	0	5	1	53.971	0.1576
10	0.5	0.3	1	1	0.03	0.04	0.4	0.5	5	1	45.246	0.111
10	0.4	0.1	1	1	0.03	0.04	0.4	0.4	5	1	43.817	0.1278
10	0.5	0.1	1	1	0.03	0.04	0.4	0	5	1	41.229	0.0932
10	0.6	0.9	1	1	0.03	0.04	0.4	0.5	5	1	65.825	0.1139
10	0.5	0.2	1	1	0.03	0.04	0.4	0.3	5	1	43.87	0.1109
10	0.5	0.3	1	1	0.03	0.04	0.4	0.6	5	1	44.344	0.113
10	0.3	0.8	1	1	0.03	0.04	0.4	0.7	5	1	42.391	0.0872
10	0.3	0.3	1	1	0.03	0.04	0.4	0.8	5	1	42.341	0.1045
10	0.5	0.7	1	1	0.03	0.04	0.4	0.8	5	1	48.882	0.0917
10	0.4	0.7	1	1	0.03	0.04	0.4	0.5	5	1	46.032	0.0969
10	0.4	0.1	1	1	0.03	0.04	0.4	0.1	5	1	42.158	0.1113
10	0.3	0.3	1	1	0.03	0.04	0.4	0.9	5	1	42.033	0.0987
10	0.4	0.9	1	1	0.03	0.04	0.4	0.1	5	1	53.516	0.1486
10	0.4	0.4	1	1	0.03	0.04	0.4	0.3	5	1	42.978	0.0988
10	0.3	0.9	1	1	0.03	0.04	0.4	0.1	5	1	47.608	0.1531
10	0.5	0.3	1	1	0.03	0.04	0.4	0.7	5	1	45.193	0.1163
10	0.3	0.8	1	1	0.03	0.04	0.4	0.6	5	1	42.991	0.0902
10	0.3	0.2	1	1	0.03	0.04	0.4	0	5	1	41.501	0.0994
10	0.4	0.99	1	1	0.03	0.04	0.4	0.2	5	1	57.154	0.1711
10	0.5	0.9	1	1	0.03	0.04	0.4	0.3	5	1	56.958	0.124
10	0.3	0.8	1	1	0.03	0.04	0.4	0.5	5	1	44.567	0.1021
10	0.4	0.99	1	1	0.03	0.04	0.4	0.1	5	1	58.252	0.1827
10	0.3	0.8	1	1	0.03	0.04	0.4	0.4	5	1	43.478	0.1032
10	0.5	0.9	1	1	0.03	0.04	0.4	0.2	5	1	59.312	0.1331
10	0.5	0.1	1	1	0.03	0.04	0.4	0.1	5	1	41.403	0.0997
10	0.3	0.9	1	1	0.03	0.04	0.4	0.4	5	1	45.136	0.12
10	0.6	0.5	1	1	0.03	0.04	0.4	0.5	5	1	50.255	0.1018
10	0.3	0.9	1	1	0.03	0.04	0.4	0.5	5	1	46.501	0.1156
10	0.6	0.01	1	1	0.03	0.04	0.4	0.9	5	1	47.205	0.3711
10	0.4	0.4	1	1	0.03	0.04	0.4	0.9	5	1	43.039	0.0946
10	0.3	0.6	1	1	0.03	0.04	0.4	0.5	5	1	41.118	0.0885
10	0.3	0.7	1	1	0.03	0.04	0.4	0.3	5	1	42.4	0.1046
10	0.4	0.6	1	1	0.03	0.04	0.4	0.7	5	1	45.204	0.0896
10	0.3	0.7	1	1	0.03	0.04	0.4	0	5	1	45.114	0.1199
10	0.4	0.8	1	1	0.03	0.04	0.4	0.2	5	1	48.487	0.1119
10	0.4	0.1	1	1	0.03	0.04	0.4	0.5	5	1	43.219	0.1322
10	0.5	0.7	1	1	0.03	0.04	0.4	0.6	5	1	52.357	0.1003
10	0.5	0.1	1	1	0.03	0.04	0.4	0.2	5	1	43.749	0.1234
10	0.4	0.9	1	1	0.03	0.04	0.4	0.9	5	1	47.871	0.081
10	0.6	0.6	1	1	0.03	0.04	0.4	0.2	5	1	51.431	0.1001
10	0.3	0.4	1	1	0.03	0.04	0.4	0.9	5	1	42.427	0.0901
10	0.4	0.8	1	1	0.03	0.04	0.4	0.3	5	1	48.071	0.1107
10	0.5	0.8	1	1	0.03	0.04	0.4	0.9	5	1	50.74	0.0874
10	0.5	0.8	1	1	0.03	0.04	0.4	0.1	5	1	54.894	0.1245
10	0.4	0.1	1	1	0.03	0.04	0.4	0.9	5	1	46.124	0.1746
10	0.4	0.8	1	1	0.03	0.04	0.4	0	5	1	48.907	0.1237
10	0.4	0.99	1	1	0.03	0.04	0.4	0.7	5	1	52.395	0.1143
10	0.5	0.1	1	1	0.03	0.04	0.4	0.8	5	1	46.802	0.1827
10	0.4	0.01	1	1	0.03	0.04	0.4	0	5	1	40.619	0.1059
10	0.4	0.5	1	1	0.03	0.04	0.4	0.1	5	1	45.393	0.0981
10	0.4	0.6	1	1	0.03	0.04	0.4	0.9	5	1	44.74	0.0878
10	0.5	0.8	1	1	0.03	0.04	0.4	0.2	5	1	54.933	0.1205
10	0.4	0.5	1	1	0.03	0.04	0.4	0	5	1	44.498	0.1028
10	0.6	0.7	1	1	0.03	0.04	0.4	0.9	5	1	54.764	0.0914
10	0.4	0.01	1	1	0.03	0.04	0.4	0.1	5	1	41.447	0.116
10	0.5	0.3	1	1	0.03	0.04	0.4	0.2	5	1	44.953	0.1045
10	0.4	0.1	1	1	0.03	0.04	0.4	0.3	5	1	42.418	0.1147
10	0.7	0.2	1	1	0.03	0.04	0.4	0.7	5	1	47.083	0.15
10	0.6	0.4	1	1	0.03	0.04	0.4	0.1	5	1	45.555	0.0971
10	0.3	0.9	1	1	0.03	0.04	0.4	0.7	5	1	43.691	0.0915
10	0.5	0.7	1	1	0.03	0.04	0.4	0.4	5	1	50.282	0.1021
10	0.5	0.7	1	1	0.03	0.04	0.4	0.3	5	1	50.811	0.1066
10	0.3	0.5	1	1	0.03	0.04	0.4	0.7	5	1	42.356	0.0937
10	0.4	0.4	1	1	0.03	0.04	0.4	0.6	5	1	44.447	0.1016
10	0.5	0.2	1	1	0.03	0.04	0.4	0.2	5	1	42.81	0.1057
10	0.3	0.4	1	1	0.03	0.04	0.4	0.4	5	1	42.7	0.1002
10	0.4	0.3	1	1	0.03	0.04	0.4	0.5	5	1	44.257	0.1002
10	0.4	0.01	1	1	0.03	0.04	0.4	0.2	5	1	42.142	0.1324
10	0.4	0.1	1	1	0.03	0.04	0.4	0.6	5	1	45.739	0.1485
10	0.5	0.2	1	1	0.03	0.04	0.4	0.7	5	1	44.988	0.1383
10	0.5	0.9	1	1	0.03	0.04	0.4	0.1	5	1	59.141	0.1411
10	0.3	0.2	1	1	0.03	0.04	0.4	0.2	5	1	42.268	0.102
10	0.5	0.99	1	1	0.03	0.04	0.4	0.1	5	1	67.142	0.1768
10	0.5	0.9	1	1	0.03	0.04	0.4	0	5	1	59.957	0.1501
10	0.5	0.01	1	1	0.03	0.04	0.4	0.2	5	1	40.946	0.1273
10	0.4	0.5	1	1	0.03	0.04	0.4	0.8	5	1	43.499	0.0903
10	0.3	0.7	1	1	0.03	0.04	0.4	0.7	5	1	40.772	0.0784
10	0.3	0.1	1	1	0.03	0.04	0.4	0.1	5	1	42.497	0.1074
10	0.2	0.99	1	1	0.03	0.04	0.4	0.4	5	1	43.311	0.1367
10	0.3	0.8	1	1	0.03	0.04	0.4	0.1	5	1	45.5	0.128
10	0.4	0.5	1	1	0.03	0.04	0.4	0.7	5	1	43.703	0.0897
10	0.5	0.8	1	1	0.03	0.04	0.4	0.5	5	1	50.896	0.0993
10	0.6	0.2	1	1	0.03	0.04	0.4	0.6	5	1	46.34	0.1376
10	0.3	0.8	1	1	0.03	0.04	0.4	0.9	5	1	40.84	0.0686
10	0.3	0.2	1	1	0.03	0.04	0.4	0.5	5	1	43.199	0.1129
10	0.4	0.2	1	1	0.03	0.04	0.4	0.9	5	1	45.94	0.1361
10	0.4	0.8	1	1	0.03	0.04	0.4	0.6	5	1	45.702	0.0916
10	0.4	0.8	1	1	0.03	0.04	0.4	0.7	5	1	46.108	0.0872
10	0.3	0.99	1	1	0.03	0.04	0.4	0	5	1	51.338	0.1984
10	0.3	0.9	1	1	0.03	0.04	0.4	0.6	5	1	43.941	0.0969
10	0.6	0.9	1	1	0.03	0.04	0.4	0.7	5	1	64.192	0.0999
10	0.3	0.99	1	1	0.03	0.04	0.4	0.5	5	1	48.726	0.1325
10	0.4	0.5	1	1	0.03	0.04	0.4	0.9	5	1	44.66	0.0899
10	0.7	0.01	1	1	0.03	0.04	0.4	0.1	5	1	39.313	0.1084
10	0.3	0.5	1	1	0.03	0.04	0.4	0.9	5	1	40.839	0.0773
10	0.3	0.2	1	1	0.03	0.04	0.4	0.6	5	1	43.939	0.1203
10	0.5	0.4	1	1	0.03	0.04	0.4	0.4	5	1	46.086	0.104
10	0.2	0.99	1	1	0.03	0.04	0.4	0.2	5	1	46.402	0.1683
10	0.4	0.4	1	1	0.03	0.04	0.4	0	5	1	44.954	0.0995
10	0.4	0.4	1	1	0.03	0.04	0.4	0.1	5	1	44.896	0.0985
10	0.4	0.4	1	1	0.03	0.04	0.4	0.2	5	1	45.129	0.0991
10	0.4	0.5	1	1	0.03	0.04	0.4	0.5	5	1	44.583	0.0988
10	0.4	0.1	1	1	0.03	0.04	0.4	0.2	5	1	42.114	0.1157
10	0.3	0.4	1	1	0.03	0.04	0.4	0.5	5	1	42.868	0.0934
10	0.3	0.99	1	1	0.03	0.04	0.4	0.1	5	1	53.861	0.1934
10	0.4	0.3	1	1	0.03	0.04	0.4	0.3	5	1	43.003	0.103
10	0.4	0.1	1	1	0.03	0.04	0.4	0.7	5	1	44.559	0.1491
10	0.4	0.1	1	1	0.03	0.04	0.4	0.8	5	1	46.575	0.1677
10	0.5	0.6	1	1	0.03	0.04	0.4	0.5	5	1	49.032	0.0986
10	0.6	0.01	1	1	0.03	0.04	0.4	0.8	5	1	48.158	0.3353
10	0.3	0.3	1	1	0.03	0.04	0.4	0.3	5	1	41.98	0.0972
10	0.3	0.2	1	1	0.03	0.04	0.4	0.8	5	1	43.393	0.1148
10	0.4	0.9	1	1	0.03	0.04	0.4	0.7	5	1	48.928	0.1011
10	0.2	0.99	1	1	0.03	0.04	0.4	0.8	5	1	39.233	0.0784
10	0.3	0.01	1	1	0.03	0.04	0.4	0.4	5	1	44.577	0.1629
10	0.3	0.2	1	1	0.03	0.04	0.4	0.9	5	1	43.901	0.1249
10	0.4	0.01	1	1	0.03	0.04	0.4	0.9	5	1	49.852	0.3378
10	0.2	0.9	1	1	0.03	0.04	0.4	0.6	5	1	40.228	0.0908
10	0.3	0.8	1	1	0.03	0.04	0.4	0.3	5	1	44.555	0.1122
10	0.3	0.7	1	1	0.03	0.04	0.4	0.2	5	1	44.534	0.1109
10	0.3	0.01	1	1	0.03	0.04	0.4	0.1	5	1	41.303	0.1132
10	0.6	0.2	1	1	0.03	0.04	0.4	0.4	5	1	44.133	0.1166
10	0.2	0.6	1	1	0.03	0.04	0.4	0.7	5	1	38.847	0.0738
10	0.5	0.99	1	1	0.03	0.04	0.4	0.8	5	1	61.744	0.1122
10	0.3	0.5	1	1	0.03	0.04	0.4	0	5	1	44.445	0.1082
10	0.3	0.7	1	1	0.03	0.04	0.4	0.8	5	1	41.191	0.079
10	0.2	0.8	1	1	0.03	0.04	0.4	0.5	5	1	40.104	0.0902
10	0.3	0.6	1	1	0.03	0.04	0.4	0.9	5	1	41.038	0.0718
10	0.3	0.7	1	1	0.03	0.04	0.4	0.1	5	1	44.924	0.1142
10	0.2	0.7	1	1	0.03	0.04	0.4	0.8	5	1	37.314	0.0623
10	0.3	0.2	1	1	0.03	0.04	0.4	0.1	5	1	41.761	0.1005
10	0.4	0.3	1	1	0.03	0.04	0.4	0	5	1	42.786	0.0954
10	0.2	0.99	1	1	0.03	0.04	0.4	0	5	1	46.149	0.1921
10	0.3	0.3	1	1	0.03	0.04	0.4	0.6	5	1	41.98	0.0957
10	0.2	0.99	1	1	0.03	0.04	0.4	0.5	5	1	41.9	0.1122
10	0.3	0.01	1	1	0.03	0.04	0.4	0.3	5	1	45.1	0.1498
10	0.6	0.4	1	1	0.03	0.04	0.4	0.9	5	1	47.94	0.1174
10	0.2	0.7	1	1	0.03	0.04	0.4	0.7	5	1	39.652	0.0721
10	0.4	0.3	1	1	0.03	0.04	0.4	0.7	5	1	44.653	0.1114
10	0.3	0.7	1	1	0.03	0.04	0.4	0.4	5	1	42.344	0.0956
10	0.2	0.9	1	1	0.03	0.04	0.4	0.3	5	1	42.182	0.1288
10	0.4	0.6	1	1	0.03	0.04	0.4	0.2	5	1	45.818	0.1018
10	0.3	0.7	1	1	0.03	0.04	0.4	0.5	5	1	42.337	0.0905
10	0.2	0.5	1	1	0.03	0.04	0.4	0.3	5	1	39.935	0.0903
10	0.3	0.4	1	1	0.03	0.04	0.4	0	5	1	41.724	0.0998
10	0.2	0.7	1	1	0.03	0.04	0.4	0.6	5	1	39.02	0.082
10	0.2	0.6	1	1	0.03	0.04	0.4	0.6	5	1	39.501	0.0814
10	0.3	0.1	1	1	0.03	0.04	0.4	0.8	5	1	44.457	0.1524
10	0.2	0.8	1	1	0.03	0.04	0.4	0	5	1	44.035	0.1476
10	0.2	0.99	1	1	0.03	0.04	0.4	0.7	5	1	40.813	0.0902
10	0.2	0.5	1	1	0.03	0.04	0.4	0.2	5	1	42.015	0.0959
10	0.4	0.1	1	1	0.03	0.04	0.4	0	5	1	42.309	0.1025
10	0.2	0.99	1	1	0.03	0.04	0.4	0.6	5	1	40.99	0.1061
10	0.3	0.3	1	1	0.03	0.04	0.4	0	5	1	42.017	0.0979
10	0.2	0.7	1	1	0.03	0.04	0.4	0.9	5	1	37.696	0.0627
10	0.1	0.6	1	1	0.03	0.04	0.4	0.6	5	1	35.535	0.0621
10	0.3	0.4	1	1	0.03	0.04	0.4	0.3	5	1	43.219	0.0999
10	0.2	0.99	1	1	0.03	0.04	0.4	0.9	5	1	37.934	0.07
10	0.2	0.3	1	1	0.03	0.04	0.4	0.4	5	1	41.558	0.0979
10	0.2	0.01	1	1	0.03	0.04	0.4	0.1	5	1	41.382	0.1148
10	0.2	0.9	1	1	0.03	0.04	0.4	0.5	5	1	40.787	0.1041
10	0.2	0.4	1	1	0.03	0.04	0.4	0.1	5	1	41.704	0.0986
10	0.2	0.8	1	1	0.03	0.04	0.4	0.1	5	1	41.067	0.1252
10	0.2	0.5	1	1	0.03	0.04	0.4	0.6	5	1	40.297	0.083
10	0.6	0.6	1	1	0.03	0.04	0.4	0.1	5	1	51.67	0.1043
10	0.2	0.6	1	1	0.03	0.04	0.4	0.4	5	1	40.983	0.0932
10	0.1	0.8	1	1	0.03	0.04	0.4	0.2	5	1	37.863	0.1128
10	0.2	0.3	1	1	0.03	0.04	0.4	0.5	5	1	41.181	0.0953
10	0.2	0.6	1	1	0.03	0.04	0.4	0.1	5	1	41.202	0.1073
10	0.2	0.3	1	1	0.03	0.04	0.4	0.2	5	1	41.657	0.0955
10	0.2	0.6	1	1	0.03	0.04	0.4	0.2	5	1	42.2	0.1044
10	0.3	0.5	1	1	0.03	0.04	0.4	0.8	5	1	41.33	0.079
10	0.2	0.3	1	1	0.03	0.04	0.4	0.6	5	1	41.118	0.0864
10	0.3	0.3	1	1	0.03	0.04	0.4	0.2	5	1	42.27	0.1009
10	0.1	0.8	1	1	0.03	0.04	0.4	0	5	1	38.086	0.1306
10	0.3	0.3	1	1	0.03	0.04	0.4	0.7	5	1	42.368	0.1019
10	0.3	0.1	1	1	0.03	0.04	0.4	0.7	5	1	44.291	0.1424
10	0.2	0.2	1	1	0.03	0.04	0.4	0.7	5	1	40.702	0.0963
10	0.2	0.7	1	1	0.03	0.04	0.4	0.5	5	1	39.565	0.0819
10	0.2	0.7	1	1	0.03	0.04	0.4	0.4	5	1	40.436	0.0934
10	0.3	0.1	1	1	0.03	0.04	0.4	0.4	5	1	44.331	0.1257
10	0.2	0.5	1	1	0.03	0.04	0.4	0.1	5	1	40.881	0.0988
10	0.1	0.3	1	1	0.03	0.04	0.4	0.3	5	1	40.422	0.0871
10	0.2	0.2	1	1	0.03	0.04	0.4	0.4	5	1	42.257	0.104
10	0.3	0.5	1	1	0.03	0.04	0.4	0.6	5	1	42.087	0.0923
10	0.1	0.8	1	1	0.03	0.04	0.4	0.9	5	1	31.677	0.0406
10	0.2	0.3	1	1	0.03	0.04	0.4	0.8	5	1	41.204	0.0909
10	0.1	0.8	1	1	0.03	0.04	0.4	0.7	5	1	32.9	0.0556
10	0.2	0.3	1	1	0.03	0.04	0.4	0.9	5	1	40.501	0.0835
10	0.2	0.01	1	1	0.03	0.04	0.4	0.4	5	1	43.871	0.1479
10	0.1	0.8	1	1	0.03	0.04	0.4	0.8	5	1	32.694	0.0486
10	0.2	0.9	1	1	0.03	0.04	0.4	0.1	5	1	41.788	0.1409
10	0.99	0.99	1	1	0.03	0.04	0.4	0.2	5	1	1266.4	0.0992
10	0.3	0.01	1	1	0.03	0.04	0.4	0	5	1	41.761	0.1037
10	0.1	0.99	1	1	0.03	0.04	0.4	0.8	5	1	33.684	0.0575
10	0.2	0.9	1	1	0.03	0.04	0.4	0	5	1	43.358	0.16
10	0.1	0.2	1	1	0.03	0.04	0.4	0.6	5	1	40.791	0.0866
10	0.3	0.3	1	1	0.03	0.04	0.4	0.4	5	1	42.125	0.0969
10	0.2	0.3	1	1	0.03	0.04	0.4	0	5	1	42.258	0.1086
10	0.2	0.3	1	1	0.03	0.04	0.4	0.1	5	1	40.977	0.0982
10	0.2	0.2	1	1	0.03	0.04	0.4	0.9	5	1	41.491	0.0948
10	0.1	0.8	1	1	0.03	0.04	0.4	0.5	5	1	35.517	0.0795
10	0.3	0.3	1	1	0.03	0.04	0.4	0.5	5	1	42.898	0.1018
10	0.3	0.2	1	1	0.03	0.04	0.4	0.3	5	1	42.487	0.1057
10	0.1	0.99	1	1	0.03	0.04	0.4	0.3	5	1	40.427	0.1438
10	0.3	0.2	1	1	0.03	0.04	0.4	0.4	5	1	42.347	0.1061
10	0.1	0.9	1	1	0.03	0.04	0.4	0	5	1	40.174	0.1622
10	0.1	0.6	1	1	0.03	0.04	0.4	0.3	5	1	38.528	0.0872
10	0.1	0.7	1	1	0.03	0.04	0.4	0	5	1	39.106	0.1193
10	0.3	0.6	1	1	0.03	0.04	0.4	0.3	5	1	43.736	0.0979
10	0.1	0.99	1	1	0.03	0.04	0.4	0.2	5	1	41.843	0.1667
10	0.2	0.4	1	1	0.03	0.04	0.4	0.9	5	1	38.834	0.0716
10	0.2	0.8	1	1	0.03	0.04	0.4	0.8	5	1	36.432	0.0669
10	0.2	0.6	1	1	0.03	0.04	0.4	0	5	1	41.16	0.1106
10	0.3	0.5	1	1	0.03	0.04	0.4	0.5	5	1	41.968	0.0947
10	0.1	0.9	1	1	0.03	0.04	0.4	0.9	5	1	30.434	0.0396
10	0.2	0.2	1	1	0.03	0.04	0.4	0.5	5	1	41.65	0.1
10	0.2	0.5	1	1	0.03	0.04	0.4	0.4	5	1	40.531	0.0912
10	0.2	0.6	1	1	0.03	0.04	0.4	0.3	5	1	40.704	0.0978
10	0.1	0.9	1	1	0.03	0.04	0.4	0.6	5	1	34.03	0.0712
10	0.2	0.9	1	1	0.03	0.04	0.4	0.4	5	1	41.655	0.1172
10	0.2	0.2	1	1	0.03	0.04	0.4	0.1	5	1	42.114	0.1008
10	0.1	0.6	1	1	0.03	0.04	0.4	0.7	5	1	35.225	0.0587
10	0.5	0.9	1	1	0.03	0.04	0.4	0.5	5	1	56.633	0.1144
10	0.2	0.4	1	1	0.03	0.04	0.4	0.2	5	1	41.762	0.0968
10	0.1	0.8	1	1	0.03	0.04	0.4	0.6	5	1	33.899	0.0654
10	0.1	0.3	1	1	0.03	0.04	0.4	0.9	5	1	36.911	0.0596
10	0.3	0.1	1	1	0.03	0.04	0.4	0.6	5	1	43.317	0.1314
10	0.2	0.4	1	1	0.03	0.04	0.4	0.3	5	1	41.694	0.0944
10	0.2	0.4	1	1	0.03	0.04	0.4	0.5	5	1	40.241	0.0873
10	0.2	0.1	1	1	0.03	0.04	0.4	0	5	1	41.437	0.0969
10	0.2	0.7	1	1	0.03	0.04	0.4	0.2	5	1	40.74	0.1066
10	0.2	0.5	1	1	0.03	0.04	0.4	0.7	5	1	39.906	0.0769
10	0.1	0.9	1	1	0.03	0.04	0.4	0.7	5	1	33.818	0.0646
10	0.2	0.4	1	1	0.03	0.04	0.4	0.6	5	1	40.641	0.0821
10	0.2	0.5	1	1	0.03	0.04	0.4	0.8	5	1	39.119	0.0718
10	0.1	0.9	1	1	0.03	0.04	0.4	0.8	5	1	30.827	0.0502
10	0.4	0.3	1	1	0.03	0.04	0.4	0.8	5	1	44.142	0.1146
10	0.1	0.99	1	1	0.03	0.04	0.4	0.1	5	1	42.925	0.1831
10	0.2	0.1	1	1	0.03	0.04	0.4	0.1	5	1	43.489	0.1074
10	0.2	0.01	1	1	0.03	0.04	0.4	0	5	1	40.483	0.0995
10	0.3	0.01	1	1	0.03	0.04	0.4	0.5	5	1	45.726	0.1864
10	0.1	0.99	1	1	0.03	0.04	0.4	0	5	1	42.688	0.2011
10	0.01	0.8	1	1	0.03	0.04	0.4	0.8	5	1	21.704	0.0093
10	0.2	0.8	1	1	0.03	0.04	0.4	0.6	5	1	38.046	0.0812
10	0.01	0.9	1	1	0.03	0.04	0.4	0.8	5	1	20.119	0.0079
10	0.1	0.5	1	1	0.03	0.04	0.4	0.6	5	1	37.303	0.0645
10	0.1	0.4	1	1	0.03	0.04	0.4	0.5	5	1	37.71	0.0761
10	0.1	0.4	1	1	0.03	0.04	0.4	0.7	5	1	37.155	0.0615
10	0.1	0.5	1	1	0.03	0.04	0.4	0.5	5	1	37.978	0.0737
10	0.2	0.1	1	1	0.03	0.04	0.4	0.7	5	1	42.772	0.1201
10	0.99	0.99	1	1	0.03	0.04	0.4	0.5	5	1	1265.1	0.0998
10	0.3	0.1	1	1	0.03	0.04	0.4	0.5	5	1	43.406	0.1258
10	0.01	0.4	1	1	0.03	0.04	0.4	0.4	5	1	34.871	0.0532
10	0.1	0.7	1	1	0.03	0.04	0.4	0.6	5	1	35.664	0.0638
10	0.2	0.4	1	1	0.03	0.04	0.4	0	5	1	43.165	0.0981
10	0.5	0.5	1	1	0.03	0.04	0.4	0.6	5	1	47.244	0.0988
10	0.2	0.6	1	1	0.03	0.04	0.4	0.9	5	1	37.971	0.0593
10	0.2	0.01	1	1	0.03	0.04	0.4	0.5	5	1	45.173	0.1756
10	0.2	0.5	1	1	0.03	0.04	0.4	0.5	5	1	40.632	0.0851
10	0.2	0.1	1	1	0.03	0.04	0.4	0.8	5	1	43.505	0.1305
10	0.01	0.8	1	1	0.03	0.04	0.4	0.2	5	1	32.847	0.0873
10	0.1	0.7	1	1	0.03	0.04	0.4	0.8	5	1	33.833	0.0446
10	0.2	0.01	1	1	0.03	0.04	0.4	0.3	5	1	43.846	0.1403
10	0.1	0.9	1	1	0.03	0.04	0.4	0.2	5	1	38.315	0.1318
10	0.1	0.3	1	1	0.03	0.04	0.4	0.6	5	1	38.53	0.0717
10	0.6	0.99	1	1	0.03	0.04	0.4	0.1	5	1	79.336	0.1753
10	0.1	0.9	1	1	0.03	0.04	0.4	0.1	5	1	38.752	0.1392
10	0.1	0.7	1	1	0.03	0.04	0.4	0.3	5	1	37.596	0.0925
10	0.1	0.6	1	1	0.03	0.04	0.4	0.4	5	1	37.438	0.0818
10	0.1	0.3	1	1	0.03	0.04	0.4	0.4	5	1	40.692	0.0856
10	0.1	0.7	1	1	0.03	0.04	0.4	0.4	5	1	36.38	0.08
10	0.01	0.6	1	1	0.03	0.04	0.4	0.8	5	1	25.398	0.0116
10	0.2	0.1	1	1	0.03	0.04	0.4	0.9	5	1	44.032	0.1367
10	0.2	0.5	1	1	0.03	0.04	0.4	0	5	1	41.999	0.1072
10	0.2	0.1	1	1	0.03	0.04	0.4	0.6	5	1	42.846	0.1187
10	0.1	0.2	1	1	0.03	0.04	0.4	0.1	5	1	42.407	0.1001
10	0.01	0.99	1	1	0.03	0.04	0.4	0	5	1	40.01	0.1948
10	0.1	0.7	1	1	0.03	0.04	0.4	0.2	5	1	38.784	0.1032
10	0.1	0.5	1	1	0.03	0.04	0.4	0.1	5	1	39.387	0.1
10	0.1	0.6	1	1	0.03	0.04	0.4	0.2	5	1	38.463	0.0938
10	0.1	0.6	1	1	0.03	0.04	0.4	0.5	5	1	37.962	0.0761
10	0.1	0.4	1	1	0.03	0.04	0.4	0.3	5	1	39.578	0.0843
10	0.1	0.4	1	1	0.03	0.04	0.4	0.2	5	1	40.083	0.0908
10	0.1	0.7	1	1	0.03	0.04	0.4	0.5	5	1	35.979	0.0747
10	0.5	0.4	1	1	0.03	0.04	0.4	0.2	5	1	44.728	0.1014
10	0.2	0.2	1	1	0.03	0.04	0.4	0.6	5	1	40.721	0.0959
10	0.5	0.01	1	1	0.03	0.04	0.4	0	5	1	39.395	0.1013
10	0.6	0.2	1	1	0.03	0.04	0.4	0.7	5	1	46.899	0.15
10	0.1	0.7	1	1	0.03	0.04	0.4	0.7	5	1	33.864	0.0524
10	0.4	0.99	1	1	0.03	0.04	0.4	0.6	5	1	52.093	0.1256
10	0.1	0.5	1	1	0.03	0.04	0.4	0.2	5	1	39.419	0.0928
10	0.01	0.2	1	1	0.03	0.04	0.4	0.2	5	1	38.255	0.074
10	0.2	0.5	1	1	0.03	0.04	0.4	0.9	5	1	38.574	0.0672
10	0.01	0.9	1	1	0.03	0.04	0.4	0.7	5	1	21.953	0.0141
10	0.01	0.7	1	1	0.03	0.04	0.4	0.4	5	1	30.817	0.0481
10	0.01	0.9	1	1	0.03	0.04	0.4	0.6	5	1	24.698	0.0241
10	0.1	0.5	1	1	0.03	0.04	0.4	0	5	1	39.444	0.1051
10	0.01	0.2	1	1	0.03	0.04	0.4	0.3	5	1	37.244	0.0682
10	0.01	0.4	1	1	0.03	0.04	0.4	0.3	5	1	35.426	0.0589
10	0.01	0.8	1	1	0.03	0.04	0.4	0.7	5	1	23.952	0.0179
10	0.01	0.99	1	1	0.03	0.04	0.4	0.8	5	1	18.906	0.0079
10	0.5	0.5	1	1	0.03	0.04	0.4	0.7	5	1	46.355	0.0975
10	0.01	0.99	1	1	0.03	0.04	0.4	0.7	5	1	21.298	0.0157
10	0.2	0.01	1	1	0.03	0.04	0.4	0.2	5	1	43.937	0.135
10	0.01	0.7	1	1	0.03	0.04	0.4	0.5	5	1	29.102	0.039
10	0.2	0.01	1	1	0.03	0.04	0.4	0.6	5	1	47.456	0.1963
10	0.01	0.7	1	1	0.03	0.04	0.4	0.9	5	1	21.945	0.0056
10	0.2	0.1	1	1	0.03	0.04	0.4	0.4	5	1	43.024	0.1151
10	0.01	0.6	1	1	0.03	0.04	0.4	0.3	5	1	33.484	0.0617
10	0.4	0.99	1	1	0.03	0.04	0.4	0.5	5	1	54.764	0.1404
10	0.01	0.7	1	1	0.03	0.04	0.4	0.3	5	1	32.583	0.0642
10	0.01	0.9	1	1	0.03	0.04	0.4	0.5	5	1	26.606	0.0401
10	0.01	0.99	1	1	0.03	0.04	0.4	0.5	5	1	26.391	0.0409
10	0.1	0.7	1	1	0.03	0.04	0.4	0.9	5	1	32.51	0.0449
10	0.4	0.99	1	1	0.03	0.04	0.4	0.4	5	1	55.344	0.1525
10	0.01	0.4	1	1	0.03	0.04	0.4	0.5	5	1	32.976	0.0404
10	0.1	0.3	1	1	0.03	0.04	0.4	0.5	5	1	40.14	0.0777
10	0.01	0.99	1	1	0.03	0.04	0.4	0.4	5	1	29.322	0.0677
10	0.01	0.1	1	1	0.03	0.04	0.4	0.8	5	1	33.465	0.0352
10	0.1	0.3	1	1	0.03	0.04	0.4	0.8	5	1	37.926	0.0644
10	0.01	0.1	1	1	0.03	0.04	0.4	0.7	5	1	35.422	0.0441
10	0.01	0.5	1	1	0.03	0.04	0.4	0.3	5	1	33.863	0.0618
10	0.01	0.8	1	1	0.03	0.04	0.4	0.3	5	1	31.251	0.0679
10	0.1	0.5	1	1	0.03	0.04	0.4	0.3	5	1	38.231	0.087
10	0.01	0.99	1	1	0.03	0.04	0.4	0.3	5	1	32.95	0.0965
10	0.2	0.1	1	1	0.03	0.04	0.4	0.5	5	1	42.751	0.1145
10	0.01	0.5	1	1	0.03	0.04	0.4	0.6	5	1	30.251	0.0322
10	0.01	0.9	1	1	0.03	0.04	0.4	0.2	5	1	33.053	0.1024
10	0.1	0.2	1	1	0.03	0.04	0.4	0.5	5	1	39.916	0.0834
10	0.1	0.6	1	1	0.03	0.04	0.4	0	5	1	40.933	0.1156
10	0.01	0.4	1	1	0.03	0.04	0.4	0.1	5	1	38.626	0.0873
10	0.1	0.6	1	1	0.03	0.04	0.4	0.1	5	1	40.505	0.1085
10	0.01	0.3	1	1	0.03	0.04	0.4	0	5	1	38.979	0.093
10	0.4	0.5	1	1	0.03	0.04	0.4	0.4	5	1	43.805	0.0952
10	0.01	0.4	1	1	0.03	0.04	0.4	0	5	1	40.694	0.1021
10	0.1	0.2	1	1	0.03	0.04	0.4	0.4	5	1	40.855	0.0862
10	0.01	0.4	1	1	0.03	0.04	0.4	0.7	5	1	28.822	0.0212
10	0.01	0.9	1	1	0.03	0.04	0.4	0.3	5	1	31.733	0.0755
10	0.01	0.2	1	1	0.03	0.04	0.4	0.9	5	1	30.357	0.0183
10	0.1	0.2	1	1	0.03	0.04	0.4	0.9	5	1	39.602	0.0724
10	0.1	0.1	1	1	0.03	0.04	0.4	0.3	5	1	40.982	0.1016
10	0.6	0.1	1	1	0.03	0.04	0.4	0.6	5	1	45.25	0.1544
10	0.01	0.8	1	1	0.03	0.04	0.4	0.5	5	1	27.768	0.0344
10	0.1	0.2	1	1	0.03	0.04	0.4	0	5	1	41.342	0.1002
10	0.01	0.9	1	1	0.03	0.04	0.4	0.4	5	1	29.126	0.0581
10	0.01	0.99	1	1	0.03	0.04	0.4	0.2	5	1	35.662	0.1268
10	0.1	0.4	1	1	0.03	0.04	0.4	0.9	5	1	36.097	0.0501
10	0.01	0.6	1	1	0.03	0.04	0.4	0.1	5	1	36.256	0.0905
10	0.01	0.5	1	1	0.03	0.04	0.4	0.1	5	1	36.244	0.0851
10	0.1	0.4	1	1	0.03	0.04	0.4	0.6	5	1	38.006	0.0659
10	0.01	0.3	1	1	0.03	0.04	0.4	0.7	5	1	30.745	0.0259
10	0.4	0.8	1	1	0.03	0.04	0.4	0.8	5	1	46.984	0.0861
10	0.1	0.3	1	1	0.03	0.04	0.4	0	5	1	41.519	0.1011
10	0.01	0.6	1	1	0.03	0.04	0.4	0.6	5	1	28.614	0.0282
10	0.6	0.9	1	1	0.03	0.04	0.4	0.4	5	1	68.171	0.119
10	0.01	0.7	1	1	0.03	0.04	0.4	0	5	1	36.69	0.1114
10	0.1	0.1	1	1	0.03	0.04	0.4	0.1	5	1	42.309	0.1012
10	0.01	0.4	1	1	0.03	0.04	0.4	0.2	5	1	36.362	0.0711
10	0.5	0.4	1	1	0.03	0.04	0.4	0	5	1	45.299	0.0971
10	0.5	0.5	1	1	0.03	0.04	0.4	0.9	5	1	46.436	0.0953
10	0.5	0.5	1	1	0.03	0.04	0.4	0.8	5	1	45.849	0.0983
10	0.1	0.3	1	1	0.03	0.04	0.4	0.2	5	1	40.856	0.0984
10	0.1	0.1	1	1	0.03	0.04	0.4	0.2	5	1	40.864	0.0979
10	0.1	0.01	1	1	0.03	0.04	0.4	0	5	1	42.586	0.1109
10	0.1	0.4	1	1	0.03	0.04	0.4	0.1	5	1	39.611	0.095
10	0.01	0.1	1	1	0.03	0.04	0.4	0.4	5	1	37.651	0.0628
10	0.1	0.3	1	1	0.03	0.04	0.4	0.1	5	1	40.968	0.0966
10	0.1	0.01	1	1	0.03	0.04	0.4	0.8	5	1	46.4	0.2019
10	0.01	0.1	1	1	0.03	0.04	0.4	0.2	5	1	39.981	0.0821
10	0.5	0.9	1	1	0.03	0.04	0.4	0.4	5	1	57.676	0.1257
10	0.1	0.2	1	1	0.03	0.04	0.4	0.8	5	1	38.735	0.0783
10	0.5	0.4	1	1	0.03	0.04	0.4	0.1	5	1	46.801	0.0994
10	0.1	0.2	1	1	0.03	0.04	0.4	0.7	5	1	38.828	0.0817
10	0.01	0.5	1	1	0.03	0.04	0.4	0.9	5	1	24.603	0.0068
10	0.01	0.3	1	1	0.03	0.04	0.4	0.1	5	1	38.575	0.0846
10	0.1	0.01	1	1	0.03	0.04	0.4	0.9	5	1	47.675	0.2313
10	0.1	0.1	1	1	0.03	0.04	0.4	0.9	5	1	40.926	0.1001
10	0.01	0.4	1	1	0.03	0.04	0.4	0.9	5	1	26.567	0.0092
10	0.01	0.6	1	1	0.03	0.04	0.4	0.9	5	1	24.106	0.0082
10	0.01	0.4	1	1	0.03	0.04	0.4	0.8	5	1	27.813	0.0149
10	0.1	0.9	1	1	0.03	0.04	0.4	0.5	5	1	36.117	0.0862
10	0.99	0.99	1	1	0.03	0.04	0.4	0.3	5	1	1320.9	0.0999
10	0.1	0.01	1	1	0.03	0.04	0.4	0.3	5	1	43.92	0.1308
10	0.01	0.5	1	1	0.03	0.04	0.4	0.8	5	1	27.352	0.0123
10	0.01	0.8	1	1	0.03	0.04	0.4	0.6	5	1	25.058	0.0253
10	0.01	0.9	1	1	0.03	0.04	0.4	0.1	5	1	35.526	0.1314
10	0.01	0.6	1	1	0.03	0.04	0.4	0.7	5	1	26.707	0.0201
10	0.01	0.7	1	1	0.03	0.04	0.4	0.1	5	1	35.066	0.0969
10	0.01	0.6	1	1	0.03	0.04	0.4	0.4	5	1	32.695	0.049
10	0.01	0.8	1	1	0.03	0.04	0.4	0	5	1	36.326	0.1304
10	0.01	0.5	1	1	0.03	0.04	0.4	0.2	5	1	35.964	0.0736
10	0.01	0.3	1	1	0.03	0.04	0.4	0.6	5	1	32.388	0.0343
10	0.01	0.1	1	1	0.03	0.04	0.4	0.5	5	1	37.228	0.056
10	0.01	0.2	1	1	0.03	0.04	0.4	0.1	5	1	39.576	0.0828
10	0.01	0.2	1	1	0.03	0.04	0.4	0.5	5	1	34.65	0.0511
10	0.01	0.6	1	1	0.03	0.04	0.4	0	5	1	37.259	0.1034
10	0.01	0.2	1	1	0.03	0.04	0.4	0.8	5	1	31.651	0.0262
10	0.01	0.5	1	1	0.03	0.04	0.4	0.5	5	1	31.725	0.0369
10	0.01	0.5	1	1	0.03	0.04	0.4	0.4	5	1	32.358	0.0489
10	0.1	0.01	1	1	0.03	0.04	0.4	0.6	5	1	45.607	0.1703
10	0.1	0.01	1	1	0.03	0.04	0.4	0.5	5	1	44.553	0.1483
10	0.01	0.1	1	1	0.03	0.04	0.4	0.6	5	1	36.432	0.0504
10	0.1	0.1	1	1	0.03	0.04	0.4	0.4	5	1	41.384	0.0995
10	0.1	0.01	1	1	0.03	0.04	0.4	0.7	5	1	45.419	0.1794
10	0.4	0.6	1	1	0.03	0.04	0.4	0.8	5	1	45.103	0.0873
10	0.01	0.01	1	1	0.03	0.04	0.4	0.7	5	1	41.951	0.1006
10	0.99	0.99	1	1	0.03	0.04	0.4	0.4	5	1	1265.5	0.1001
10	0.01	0.2	1	1	0.03	0.04	0.4	0.6	5	1	33.682	0.0402
10	0.4	0.99	1	1	0.03	0.04	0.4	0.3	5	1	55.251	0.1578
10	0.01	0.2	1	1	0.03	0.04	0.4	0.4	5	1	35.092	0.0556
10	0.01	0.3	1	1	0.03	0.04	0.4	0.2	5	1	38.185	0.0735
10	0.1	0.01	1	1	0.03	0.04	0.4	0.1	5	1	42.06	0.1104
10	0.1	0.1	1	1	0.03	0.04	0.4	0.8	5	1	41.714	0.1015
10	0.01	0.3	1	1	0.03	0.04	0.4	0.3	5	1	37.347	0.0641
10	0.3	0.99	1	1	0.03	0.04	0.4	0.4	5	1	50.522	0.1468
10	0.4	0.01	1	1	0.03	0.04	0.4	0.3	5	1	42.463	0.1409
10	0.3	0.9	1	1	0.03	0.04	0.4	0.8	5	1	42.934	0.0825
10	0.99	0.99	1	1	0.03	0.04	0.4	0.1	5	1	1263	0.1043
10	0.01	0.01	1	1	0.03	0.04	0.4	0.5	5	1	40.577	0.0946
10	0.01	0.01	1	1	0.03	0.04	0.4	0.1	5	1	41.909	0.0997
10	0.01	0.1	1	1	0.03	0.04	0.4	0.9	5	1	33.192	0.0275
10	0.01	0.01	1	1	0.03	0.04	0.4	0.6	5	1	42.096	0.0982
10	0.3	0.6	1	1	0.03	0.04	0.4	0.1	5	1	43.969	0.113
10	0.4	0.3	1	1	0.03	0.04	0.4	0.6	5	1	43.708	0.1043
10	0.3	0.99	1	1	0.03	0.04	0.4	0.3	5	1	50.016	0.1567
10	0.3	0.6	1	1	0.03	0.04	0.4	0.4	5	1	41.922	0.0923
10	0.3	0.01	1	1	0.03	0.04	0.4	0.2	5	1	42.24	0.1319
10	0.4	0.6	1	1	0.03	0.04	0.4	0.3	5	1	46.219	0.1006
10	0.4	0.3	1	1	0.03	0.04	0.4	0.1	5	1	44.228	0.101
10	0.3	0.99	1	1	0.03	0.04	0.4	0.8	5	1	44.587	0.0935
10	0.3	0.01	1	1	0.03	0.04	0.4	0.6	5	1	46.877	0.2125
10	0.3	0.5	1	1	0.03	0.04	0.4	0.1	5	1	42.809	0.1004
10	0.3	0.4	1	1	0.03	0.04	0.4	0.2	5	1	42.814	0.1005
10	0.4	0.6	1	1	0.03	0.04	0.4	0.5	5	1	45.781	0.0929
10	0.4	0.6	1	1	0.03	0.04	0.4	0.4	5	1	46.116	0.1022
10	0.99	0.99	1	1	0.03	0.04	0.4	0.8	5	1	1276.7	0.1011
10	0.4	0.01	1	1	0.03	0.04	0.4	0.7	5	1	47.991	0.2621
10	0.01	0.01	1	1	0.03	0.04	0.4	0	5	1	41.452	0.1016
10	0.3	0.7	1	1	0.03	0.04	0.4	0.9	5	1	40.622	0.0702
10	0.5	0.5	1	1	0.03	0.04	0.4	0	5	1	47.022	0.099
10	0.5	0.6	1	1	0.03	0.04	0.4	0.9	5	1	48.811	0.0911
10	0.5	0.01	1	1	0.03	0.04	0.4	0.9	5	1	50.009	0.359
10	0.5	0.01	1	1	0.03	0.04	0.4	0.8	5	1	48.965	0.3176
10	0.4	0.01	1	1	0.03	0.04	0.4	0.8	5	1	48.655	0.2904
10	0.01	0.2	1	1	0.03	0.04	0.4	0.7	5	1	32.74	0.032
10	0.3	0.6	1	1	0.03	0.04	0.4	0	5	1	44.187	0.1078
10	0.3	0.8	1	1	0.03	0.04	0.4	0.2	5	1	45.853	0.1231
10	0.5	0.4	1	1	0.03	0.04	0.4	0.3	5	1	45.43	0.0974
10	0.01	0.01	1	1	0.03	0.04	0.4	0.8	5	1	42.166	0.1008
10	0.3	0.5	1	1	0.03	0.04	0.4	0.2	5	1	42.554	0.0961
10	0.3	0.6	1	1	0.03	0.04	0.4	0.2	5	1	43.538	0.1051
10	0.1	0.99	1	1	0.03	0.04	0.4	0.9	5	1	31.191	0.047
10	0.2	0.8	1	1	0.03	0.04	0.4	0.9	5	1	36.602	0.0585
10	0.5	0.2	1	1	0.03	0.04	0.4	0.5	5	1	43.792	0.119
10	0.2	0.7	1	1	0.03	0.04	0.4	0.1	5	1	41.771	0.1102
10	0.2	0.8	1	1	0.03	0.04	0.4	0.4	5	1	40.279	0.103
10	0.3	0.8	1	1	0.03	0.04	0.4	0	5	1	46.285	0.1398
10	0.1	0.99	1	1	0.03	0.04	0.4	0.6	5	1	35.309	0.0826
10	0.1	0.99	1	1	0.03	0.04	0.4	0.7	5	1	34.641	0.0693
10	0.4	0.2	1	1	0.03	0.04	0.4	0.6	5	1	43.143	0.117
10	0.3	0.2	1	1	0.03	0.04	0.4	0.7	5	1	43.115	0.1126
10	0.2	0.99	1	1	0.03	0.04	0.4	0.1	5	1	47.086	0.1831
10	0.1	0.9	1	1	0.03	0.04	0.4	0.4	5	1	37.83	0.1067
10	0.2	0.8	1	1	0.03	0.04	0.4	0.7	5	1	37.569	0.0715
10	0.1	0.99	1	1	0.03	0.04	0.4	0.5	5	1	38.552	0.1022
10	0.1	0.9	1	1	0.03	0.04	0.4	0.3	5	1	39	0.1204
10	0.3	0.4	1	1	0.03	0.04	0.4	0.7	5	1	42.574	0.0947
10	0.3	0.01	1	1	0.03	0.04	0.4	0.8	5	1	48.563	0.2717
10	0.3	0.4	1	1	0.03	0.04	0.4	0.8	5	1	41.856	0.0909
10	0.4	0.01	1	1	0.03	0.04	0.4	0.4	5	1	44.53	0.1735
10	0.4	0.01	1	1	0.03	0.04	0.4	0.5	5	1	45.865	0.1942
10	0.4	0.2	1	1	0.03	0.04	0.4	0.1	5	1	42.321	0.0985
10	0.4	0.2	1	1	0.03	0.04	0.4	0	5	1	41.608	0.094
10	0.01	0.4	1	1	0.03	0.04	0.4	0.6	5	1	31.633	0.0321
10	0.3	0.6	1	1	0.03	0.04	0.4	0.6	5	1	41.404	0.0841
10	0.3	0.6	1	1	0.03	0.04	0.4	0.7	5	1	41.27	0.0802
10	0.3	0.4	1	1	0.03	0.04	0.4	0.6	5	1	41.767	0.0898
10	0.5	0.01	1	1	0.03	0.04	0.4	0.5	5	1	45.173	0.2052
10	0.4	0.2	1	1	0.03	0.04	0.4	0.2	5	1	42.376	0.1023
10	0.1	0.7	1	1	0.03	0.04	0.4	0.1	5	1	37.974	0.1065
10	0.3	0.8	1	1	0.03	0.04	0.4	0.8	5	1	41.983	0.0775
10	0.4	0.2	1	1	0.03	0.04	0.4	0.3	5	1	42.831	0.1054
10	0.3	0.3	1	1	0.03	0.04	0.4	0.1	5	1	42.727	0.1029
10	0.4	0.3	1	1	0.03	0.04	0.4	0.9	5	1	44.803	0.1138
10	0.4	0.2	1	1	0.03	0.04	0.4	0.5	5	1	43.286	0.1151
10	0.3	0.1	1	1	0.03	0.04	0.4	0.9	5	1	46.205	0.1644
10	0.4	0.2	1	1	0.03	0.04	0.4	0.4	5	1	43.463	0.1122
10	0.5	0.01	1	1	0.03	0.04	0.4	0.6	5	1	47.876	0.2497
10	0.1	0.8	1	1	0.03	0.04	0.4	0.4	5	1	37.368	0.0887
10	0.01	0.7	1	1	0.03	0.04	0.4	0.2	5	1	33.315	0.0804
10	0.3	0.6	1	1	0.03	0.04	0.4	0.8	5	1	40.633	0.0792
10	0.2	0.1	1	1	0.03	0.04	0.4	0.3	5	1	43.156	0.1126
10	0.5	0.3	1	1	0.03	0.04	0.4	0.3	5	1	44.762	0.1078
10	0.1	0.5	1	1	0.03	0.04	0.4	0.4	5	1	36.66	0.0763
10	0.2	0.9	1	1	0.03	0.04	0.4	0.9	5	1	35.955	0.0584
10	0.01	0.8	1	1	0.03	0.04	0.4	0.4	5	1	29.232	0.0529
10	0.5	0.3	1	1	0.03	0.04	0.4	0.4	5	1	44.524	0.106
10	0.1	0.1	1	1	0.03	0.04	0.4	0.5	5	1	41.474	0.0954
10	0.2	0.7	1	1	0.03	0.04	0.4	0	5	1	41.996	0.1166
10	0.01	0.7	1	1	0.03	0.04	0.4	0.6	5	1	27.725	0.0259
10	0.1	0.99	1	1	0.03	0.04	0.4	0.4	5	1	39.842	0.1326
10	0.5	0.7	1	1	0.03	0.04	0.4	0.1	5	1	51.725	0.1111
10	0.1	0.1	1	1	0.03	0.04	0.4	0.6	5	1	40.79	0.1037
10	0.01	0.8	1	1	0.03	0.04	0.4	0.1	5	1	33.606	0.1055
10	0.5	0.7	1	1	0.03	0.04	0.4	0.5	5	1	50.803	0.1027
10	0.01	0.9	1	1	0.03	0.04	0.4	0.9	5	1	18.404	0.0057
10	0.3	0.4	1	1	0.03	0.04	0.4	0.1	5	1	43.334	0.1004
10	0.01	0.01	1	1	0.03	0.04	0.4	0.3	5	1	42.551	0.1023
10	0.2	0.3	1	1	0.03	0.04	0.4	0.7	5	1	40.127	0.0885
10	0.2	0.7	1	1	0.03	0.04	0.4	0.3	5	1	39.257	0.0947
10	0.01	0.3	1	1	0.03	0.04	0.4	0.5	5	1	33.761	0.0411
10	0.4	0.9	1	1	0.03	0.04	0.4	0.8	5	1	49.643	0.094
10	0.5	0.8	1	1	0.03	0.04	0.4	0.6	5	1	52.572	0.0979
10	0.1	0.2	1	1	0.03	0.04	0.4	0.3	5	1	40.947	0.0939
10	0.01	0.3	1	1	0.03	0.04	0.4	0.4	5	1	35.682	0.0555
10	0.01	0.99	1	1	0.03	0.04	0.4	0.6	5	1	24.075	0.0268
10	0.2	0.2	1	1	0.03	0.04	0.4	0.8	5	1	41.159	0.0989
10	0.01	0.01	1	1	0.03	0.04	0.4	0.9	5	1	42.292	0.1055
10	0.01	0.8	1	1	0.03	0.04	0.4	0.9	5	1	20.284	0.0058
10	0.1	0.1	1	1	0.03	0.04	0.4	0	5	1	42.858	0.1009
10	0.4	0.01	1	1	0.03	0.04	0.4	0.6	5	1	47.627	0.2272
10	0.01	0.99	1	1	0.03	0.04	0.4	0.1	5	1	36.898	0.1617
10	0.3	0.01	1	1	0.03	0.04	0.4	0.9	5	1	49.24	0.3121
10	0.01	0.1	1	1	0.03	0.04	0.4	0.3	5	1	38.984	0.0782
10	0.01	0.2	1	1	0.03	0.04	0.4	0	5	1	40.806	0.1002
10	0.01	0.7	1	1	0.03	0.04	0.4	0.7	5	1	26.126	0.0166
10	0.1	0.6	1	1	0.03	0.04	0.4	0.9	5	1	32.635	0.0425
10	0.3	0.99	1	1	0.03	0.04	0.4	0.6	5	1	47.396	0.1209
10	0.1	0.5	1	1	0.03	0.04	0.4	0.7	5	1	35.53	0.0586
10	0.01	0.7	1	1	0.03	0.04	0.4	0.8	5	1	23.848	0.0088
10	0.01	0.3	1	1	0.03	0.04	0.4	0.8	5	1	29.579	0.0188
10	0.1	0.6	1	1	0.03	0.04	0.4	0.8	5	1	33.959	0.0494
10	0.2	0.9	1	1	0.03	0.04	0.4	0.2	5	1	42.783	0.1376
10	0.5	0.01	1	1	0.03	0.04	0.4	0.7	5	1	46.368	0.2621
10	0.1	0.01	1	1	0.03	0.04	0.4	0.2	5	1	44.035	0.1251
10	0.01	0.3	1	1	0.03	0.04	0.4	0.9	5	1	27.667	0.0124
10	0.3	0.01	1	1	0.03	0.04	0.4	0.7	5	1	48.244	0.2413
10	0.2	0.99	1	1	0.03	0.04	0.4	0.3	5	1	44.713	0.1587
10	0.3	0.1	1	1	0.03	0.04	0.4	0.2	5	1	42.116	0.1104
10	0.01	0.9	1	1	0.03	0.04	0.4	0	5	1	36.38	0.1495
10	0.2	0.9	1	1	0.03	0.04	0.4	0.7	5	1	37.592	0.0755
10	0.1	0.5	1	1	0.03	0.04	0.4	0.9	5	1	34.464	0.0448
10	0.4	0.4	1	1	0.03	0.04	0.4	0.5	5	1	43.184	0.0975
10	0.2	0.2	1	1	0.03	0.04	0.4	0.3	5	1	42.624	0.0988
10	0.1	0.5	1	1	0.03	0.04	0.4	0.8	5	1	36.084	0.0523
10	0.1	0.8	1	1	0.03	0.04	0.4	0.3	5	1	37.306	0.1006
10	0.5	0.6	1	1	0.03	0.04	0.4	0.4	5	1	48.926	0.102
10	0.2	0.8	1	1	0.03	0.04	0.4	0.2	5	1	40.641	0.1152
10	0.1	0.01	1	1	0.03	0.04	0.4	0.4	5	1	44.298	0.1379
10	0.01	0.6	1	1	0.03	0.04	0.4	0.5	5	1	30.713	0.0381
10	0.3	0.5	1	1	0.03	0.04	0.4	0.3	5	1	43.677	0.1005
10	0.2	0.1	1	1	0.03	0.04	0.4	0.2	5	1	40.856	0.0968
10	0.1	0.4	1	1	0.03	0.04	0.4	0	5	1	41.103	0.1046
10	0.1	0.4	1	1	0.03	0.04	0.4	0.4	5	1	38.261	0.0757
10	0.1	0.3	1	1	0.03	0.04	0.4	0.7	5	1	37.491	0.0654
10	0.2	0.2	1	1	0.03	0.04	0.4	0.2	5	1	41.816	0.0975
10	0.01	0.01	1	1	0.03	0.04	0.4	0.4	5	1	40.114	0.0971
10	0.2	0.2	1	1	0.03	0.04	0.4	0	5	1	41.623	0.101
10	0.3	0.5	1	1	0.03	0.04	0.4	0.4	5	1	42.827	0.0974
10	0.01	0.1	1	1	0.03	0.04	0.4	0.1	5	1	40.029	0.086
10	0.2	0.6	1	1	0.03	0.04	0.4	0.5	5	1	39.643	0.0823
10	0.01	0.6	1	1	0.03	0.04	0.4	0.2	5	1	34.857	0.0782
10	0.3	0.1	1	1	0.03	0.04	0.4	0.3	5	1	42.56	0.1112
10	0.1	0.1	1	1	0.03	0.04	0.4	0.7	5	1	41.321	0.0939
10	0.2	0.01	1	1	0.03	0.04	0.4	0.7	5	1	46.445	0.2118
10	0.2	0.01	1	1	0.03	0.04	0.4	0.8	5	1	47.768	0.2448
10	0.01	0.1	1	1	0.03	0.04	0.4	0	5	1	40.6	0.0918
10	0.2	0.01	1	1	0.03	0.04	0.4	0.9	5	1	48.874	0.2839
10	0.01	0.01	1	1	0.03	0.04	0.4	0.2	5	1	41.401	0.0973
10	0.99	0.99	1	1	0.03	0.04	0.4	0.9	5	1	1298.8	0.1003
10	0.99	0.99	1	1	0.03	0.04	0.4	0.6	5	1	1273.5	0.098
10	0.5	0.01	1	1	0.03	0.04	0.4	0.1	5	1	40.67	0.1188
10	0.7	0.01	1	1	0.03	0.04	0.4	0.7	5	1	46.524	0.2972
10	0.3	0.1	1	1	0.03	0.04	0.4	0	5	1	41.426	0.0987
10	0.8	0.1	1	1	0.03	0.04	0.4	0.7	5	1	46.85	0.1856
10	0.99	0.1	1	1	0.03	0.04	0.4	0.8	5	1	48.295	0.2311
10	0.1	0.2	1	1	0.03	0.04	0.4	0.2	5	1	41.036	0.0968
10	0.4	0.2	1	1	0.03	0.04	0.4	0.7	5	1	44.009	0.1307
10	0.2	0.3	1	1	0.03	0.04	0.4	0.3	5	1	40.175	0.0904
10	0.99	0.3	1	1	0.03	0.04	0.4	0.5	5	1	50.71	0.1103
10	0.7	0.3	1	1	0.03	0.04	0.4	0.9	5	1	49.898	0.1483
10	0.99	0.4	1	1	0.03	0.04	0.4	0.2	5	1	53.452	0.0747
10	0.2	0.4	1	1	0.03	0.04	0.4	0.4	5	1	41.251	0.0927
10	0.2	0.4	1	1	0.03	0.04	0.4	0.7	5	1	39.481	0.0818
10	0.1	0.4	1	1	0.03	0.04	0.4	0.8	5	1	36.237	0.0559
10	0.2	0.4	1	1	0.03	0.04	0.4	0.8	5	1	39.042	0.0731
10	0.01	0.5	1	1	0.03	0.04	0.4	0	5	1	37.451	0.0987
10	0.01	0.5	1	1	0.03	0.04	0.4	0.7	5	1	29.08	0.0227
10	0.2	0.6	1	1	0.03	0.04	0.4	0.8	5	1	37.226	0.062
10	0.6	0.6	1	1	0.03	0.04	0.4	0.9	5	1	51.408	0.0982
10	0.5	0.7	1	1	0.03	0.04	0.4	0	5	1	50.771	0.11
10	0.4	0.7	1	1	0.03	0.04	0.4	0.4	5	1	46.025	0.0983
10	0.7	0.7	1	1	0.03	0.04	0.4	0.6	5	1	60.757	0.0976
10	0.1	0.8	1	1	0.03	0.04	0.4	0.1	5	1	38.353	0.123
10	0.2	0.8	1	1	0.03	0.04	0.4	0.3	5	1	41.026	0.1111
10	0.4	0.8	1	1	0.03	0.04	0.4	0.9	5	1	44.631	0.0807
10	0.3	0.9	1	1	0.03	0.04	0.4	0	5	1	48.885	0.163
10	0.3	0.9	1	1	0.03	0.04	0.4	0.2	5	1	47.157	0.1356
10	0.2	0.9	1	1	0.03	0.04	0.4	0.8	5	1	36.925	0.0692
10	0.01	0.99	1	1	0.03	0.04	0.4	0.9	5	1	17.023	0.0033
10	0.7	0.99	1	1	0.03	0.04	0.4	0.9	5	1	91.27	0.1042
